# Supplementary material for: Delayed antibiotic exposure induces population collapse in enterococcal communities with drug-resistant subpopulations
Source: eLife journal article supplement (doi:10.7554/elife.52813), 2020-03-23
Supplement: supp [file elife-52813-supp-v1.zip]

Archive with 16 entries (16 files):
- elife_poa_e52813_Figure_3_figure_supplement_4.pdf
- elife_poa_e52813_Figure_3_figure_supplement_5.pdf
- elife_poa_e52813_Figure_3_figure_supplement_1.pdf
- elife_poa_e52813_Figure_4_source_data_1.xlsx
- elife_poa_e52813_Figure_3_figure_supplement_7.pdf
- elife_poa_e52813_Figure_1_source_data_1.xlsx
- elife_poa_e52813_Figure_3_figure_supplement_2.pdf
- elife_poa_e52813_Figure_5_figure_supplement_1.pdf
- elife_poa_e52813_Figure_3_figure_supplement_6.pdf
- elife_poa_e52813_Figure_3_source_data_2.xlsx
- elife_poa_e52813_Figure_5_source_data_1.xlsx
- elife_poa_e52813_Figure_3_figure_supplement_3.pdf
- elife_poa_e52813_Figure_2_figure_supplement_1.pdf
- elife_poa_e52813_Figure_3_figure_supplement_8.pdf
- elife_poa_e52813_Figure_3_source_data_1.xlsx
- elife_poa_e52813_Transparent_Reporting_File.docx
