# Supplementary material for: Delayed antibiotic exposure induces population collapse in enterococcal communities with drug-resistant subpopulations
Source: eLife journal article supplement (doi:10.7554/elife.52813), 2020-03-23
Supplement: supp [file elife-52813-supp-v1.zip › elife_poa_e52813_Figure_1_source_data_1.xlsx]

## Sheet: Sheet1
Figure 1A
AMP Concentration for Resistant Dose Response Curves Batch 1
0	0.1	0.25	0.5	0.75	1	2	3	4	5	7.5
Resistant (OD) Dose Response Batch 1												Inoc Density
1	0.96872	0.87291	0.88667	-0.0022156	-0.012419	0.012368	-0.0034589	0	0.0084602	-0.021253		6e-09
1	1.0554	0.97756	1.0443	0.024174	0.0085597	0.020376	0.013371	0.030539	0.01955	0.0086581		6e-08
1	1.0207	1.0029	1.0169	0.99602	0.90864	0.02237	0.033724	0.048697	0.028517	0.030908		6e-07
AMP Concentration for Resistant Dose Response Curves Batch 2
0	0.25	0.5	0.75	1	1.5	2	3	4	5	6
Resistant (OD) Dose Response Batch 2
0.96415	0.85337	0.83706	0.81667	0.86017	0.85065	0.85813	0.056046	-0.026732	-0.028091	-0.026052		6e-06
0.99066	0.72357	0.76094	0.6923	0.80172	0.72764	0.71405	0.82483	0.81463	0.84046	0.84862		6e-05
0.99337	0.79425	0.78609	0.69502	0.76842	0.73512	0.65289	0.73036	0.70725	0.79425	0.73172		0.0006
1.0518	0.88939	0.87648	0.92133	0.96415	0.9125	0.91386	0.91862	0.94376	0.74056	0.87784		0.006
Note: OD is background subtracted (leading to possible negative numbers)
IC50 Resistant (1st 3 from batch 1, next 4 from batch 2)
0.7779	0.9515	1.6724	2.3392	NaN	NaN	NaN			NaN indicates accurate estimate was not possible (drug had little effect even at highest dose)
AMP Concentration for Sensitive Dose Response Curves Batch 1
0	0.1	0.2	0.3	0.4	0.5	0.6	0.7	0.8	0.9	1
Sensitive (OD) Dose Response Batch 1												Inoc Density
1	0.62838	0.51156	0.38035	0.007661	0.016383	0.021856	0.0054513	0.0021906	0.0098325	0.006555		6e-09
1	0.64538	0.59563	0.43478	0.0040891	0.019474	0.010324	0.0060729	0.010202	0.0040081	0.010202		6e-08
1	0.81056	0.65504	0.16169	0.071773	0.028034	0.014338	0.020826	0.00294	0.0013621	0.00294		6e-07
AMP Concentration for Sensitive Dose Response Curves Batch 2
0	0.1	0.25	0.5	1	2	3	4	5	7.5	10
Sensitive (OD) Dose Response Batch 2
0.95651	0.62614	0.35132	0.096967	0.36594	-0.036789	-0.036058	-0.033134	-0.046291	-0.038982	-0.038982		6e-06
0.9989	0.51285	0.32866	0.076501	0.36667	0.087465	-0.026556	-0.033134	-0.042636	-0.041905	-0.036058		6e-05
1.0099	0.51578	0.31624	0.10135	0.14813	0.039956	-0.015593	-0.036058	-0.043367	-0.041905	-0.040443		0.0006
1.0347	0.75113	0.37617	0.037033	0.10281	0.10793	0.055305	-0.032403	-0.044829	-0.043367	-0.035327		0.006
IC50 Sensitive (1st 3 from batch 1, next 4 from batch 2)
0.16714	0.19274	0.21938	0.14774	0.11427	0.11454	0.18004
Figure 1B
time 1
0.25	0.33333	0.41667	0.5	0.58333	0.66667	0.75	0.83333	0.91667	1	1.0833	1.1667	1.25	1.3333	1.4167	1.5	1.5833	1.6667	1.75	1.8333	1.9167	2	2.0833	2.1667	2.25	2.3333	2.4167	2.5	2.5833	2.6667	2.75	2.7956
Gr Rate
0.95175	0.86803	0.94412	0.96739	1.0456	1.1471	1.0368	1.0575	1.0399	0.87462	0.74652	0.43289	-0.16687	0.10134	-0.13007	-0.18391	-0.43028	-0.51203	-0.61439	-0.73338	-0.76337	-0.64129	-0.4526	-0.43429	-0.46027	-0.44335	-0.37475	-0.35636	-0.34079	-0.31488	-0.34276	-0.33457
Gr Error
0.015422	0.0088125	0.088235	0.035338	0.11029	0.14338	0.044118	0.11016	0.10795	0.0088346	0.070677	0.0022086	NaN	0.028641	0.083824	0.041859	0.053007	0.061842	0.094853	0.063971	0.088125	0.081516	0.048529	0.046382	0.024295	0.017669	NaN	NaN	NaN	NaN	NaN	NaN
time 2
0.25	0.33333	0.41667	0.5	0.58333	0.66667	0.75	0.83333	0.91667	1	1.0833	1.1667	1.25	1.3333	1.4167	1.5	1.5833	1.6667	1.75	1.8333	1.9167	2	2.0833	2.1667	2.25	2.3333	2.4167	2.5	2.5833	2.6667	2.75	2.7956
Gr Rate
0.80194	0.86142	0.85588	0.92321	0.93088	0.97279	0.96397	0.96717	0.96717	0.90775	0.94972	0.97843	1.0257	0.92752	0.9	0.87024	0.74431	0.84591	0.88456	0.73015	0.83278	0.81295	0.62647	0.83487	0.73769	0.76198	0.76008	0.67416	0.59779	0.51774	0.46382	0.37917
Gr Error
0.022031	0.0022031	0.030882	0.11043	0.022059	0.099265	0.081618	0.072703	0.072703	0.068468	0.053007	0.0022086	0.055147	0.10795	0.15882	0.15642	0.064051	0.015461	0.0022059	0.094853	0.048469	0.11236	0.083824	0.04859	0.11927	0.046382	0.046266	0.10575	0.028676	0.028641	0.10601	0.048465
Figure 1D
Top panel
Amp Influx	0	0.0058824	0.011765	0.017647	0.023529	0.035294	0.058824	0.11765	0.17647	0.23529	0.29412	0.35294	0.47059	1.1765
OD	0.7517	0.73191	0.69062	0.51597	0.40376	0.14311	0.11888	0.10206	0.16968	0.10522	0.12132	0.088458	0.06562	0.088826
OD1 error	0.038776	0.055485	0.02214	0.10906	0.22418	0.0042368	0.025159	0.020658	0.03921	0.025537	0.035512	0.022682	0.00040335	0.030177
OD2	0.77067	0.68978	0.70737	0.44831	0.21113	0.21063	0.13554	0.079136	0.081614	-0.0048371	0.087148	0.019243	0.037871	0.045494
OD2 error	0.069803	0.015503	0.0096758	0.017627	0.0059906	0.017778	0.027317	0.080363	0.042196	0.0046215	0.00077205	0.043581	0.033167	0.0185
Bottom panel
time	0	0.041666	0.083332	0.125	0.16666	0.20833	0.25	0.29167	0.33333	0.375	0.41667	0.45833	0.5	0.54167	0.58333	0.625	0.66667	0.70833	0.75	0.79167	0.83333	0.875	0.91667	0.95833	1	1.0417	1.0833	1.125	1.1667	1.2083	1.25	1.2917	1.3333	1.375	1.4167	1.4583	1.5	1.5417	1.5833	1.625	1.6667	1.7083	1.75	1.7917	1.8333	1.875	1.9167	1.9583	2
OD High	0.53416	0.53339	0.55345	0.57431	0.59258	0.61096	0.62925	0.64769	0.66541	0.68256	0.69944	0.71552	0.73192	0.7473	0.76093	0.77263	0.78308	0.79158	0.79833	0.80367	0.80754	0.81083	0.81404	0.81747	0.81946	0.8215	0.82422	0.82666	0.8288	0.83012	0.83112	0.83153	0.83312	0.83416	0.83456	0.83493	0.83522	0.83507	0.83396	0.83226	0.8307	0.82853	0.82676	0.82531	0.82451	0.82584	0.82797	0.83032	0.83217
time	0	0.041666	0.083332	0.125	0.16666	0.20833	0.25	0.29167	0.33333	0.375	0.41667	0.45833	0.5	0.54167	0.58333	0.625	0.66667	0.70833	0.75	0.79167	0.83333	0.875	0.91667	0.95833	1	1.0417	1.0833	1.125	1.1667	1.2083	1.25	1.2917	1.3333	1.375	1.4167	1.4583	1.5	1.5417	1.5833	1.625	1.6667	1.7083	1.75	1.7917	1.8333	1.875	1.9167	1.9583	2
OD Low	0.080072	0.082587	0.084628	0.087174	0.089671	0.091979	0.094205	0.096567	0.099074	0.10083	0.10224	0.10353	0.10469	0.10558	0.10581	0.1052	0.1041	0.1033	0.10229	0.10066	0.098686	0.096471	0.094616	0.092952	0.091301	0.089333	0.08717	0.085122	0.08315	0.081365	0.079339	0.077251	0.075047	0.072949	0.071072	0.069348	0.067569	0.065828	0.064005	0.062175	0.060663	0.059258	0.057814	0.056267	0.054748	0.053194	0.051826	0.050682	0.04945
[truncated: 1,021 more columns]
