# Supplementary material for: Delayed antibiotic exposure induces population collapse in enterococcal communities with drug-resistant subpopulations
Source: eLife journal article supplement (doi:10.7554/elife.52813), 2020-03-23
Supplement: supp [file elife-52813-supp-v1.zip › elife_poa_e52813_Figure_3_source_data_1.xlsx]

## Sheet: Sheet1
Data below is given as matrices, with each column a time point and each row a replicate (or the mean over replicates).
Matrices correspond to time (for each of the 3 resistance fractions) and to OD (for each of the 3 resistance fractions)
(Data includes only every 500th time step to reduce file size)
time 80R
0	0.20833	0.41666	0.625	0.83333	1.0417	1.25	1.4583	1.6667	1.875	2.0833	2.2917	2.5	2.7083	2.9167	3.125	3.3333	3.5417	3.75	3.9583	4.1667	4.375	4.5833	4.7917	5	5.2083	5.4167	5.625	5.8333	6.0417	6.25	6.4583	6.6667	6.875	7.0833	7.2917	7.5	7.7083	7.9167	8.125	8.3333	8.5417	8.75	8.9583	9.1667	9.375	9.5833	9.7917	10	10.2083
0	0.20833	0.42541	0.63375	0.84208	1.0504	1.2587	1.4671	1.6754	1.8837	2.0921	2.3004	2.5087	2.7171	2.9254	3.1337	3.3421	3.5504	3.7587	3.9671	4.1754	4.3838	4.5921	4.8004	5.0087	5.2171	5.4254	5.6337	5.8421	6.0504	6.2587	6.4671	6.6754	6.8838	7.0921	7.3004	7.5087	7.7171	7.9254	8.1337	8.3421	8.5504	8.7587	8.9671	9.1754	9.3837	9.5921	9.8004	10.0087	10.2171
0	0.20833	0.41666	0.625	0.83333	1.0417	1.25	1.4583	1.6667	1.875	2.0833	2.2917	2.5	2.7083	2.9167	3.125	3.3333	3.5417	3.75	3.9583	4.1667	4.375	4.5833	4.7917	5	5.2083	5.4167	5.625	5.8333	6.0417	6.25	6.4583	6.6667	6.875	7.0833	7.2917	7.5	7.7083	7.9167	8.125	8.3333	8.5417	8.75	8.9583	9.1667	9.375	9.5833	9.7917	10	10.2083
0	0.20833	0.41666	0.625	0.83333	1.0417	1.25	1.4583	1.6667	1.875	2.0833	2.2917	2.5	2.7083	2.9167	3.125	3.3333	3.5417	3.75	3.9583	4.1667	4.375	4.5833	4.7917	5	5.2083	5.4167	5.625	5.8333	6.0417	6.25	6.4583	6.6667	6.875	7.0833	7.2917	7.5	7.7083	7.9167	8.125	8.3333	8.5417	8.75	8.9583	9.1667	9.375	9.5833	9.7917	10	10.2083
0	0.20833	0.42541	0.63375	0.84208	1.0504	1.2587	1.4671	1.6754	1.8837	2.0921	2.3004	2.5087	2.7171	2.9254	3.1337	3.3421	3.5504	3.7587	3.9671	4.1754	4.3838	4.5921	4.8004	5.0087	5.2171	5.4254	5.6337	5.8421	6.0504	6.2587	6.4671	6.6754	6.8838	7.0921	7.3004	7.5087	7.7171	7.9254	8.1337	8.3421	8.5504	8.7587	8.9671	9.1754	9.3837	9.5921	9.8004	10.0087	10.2171
0	0.20833	0.42541	0.63375	0.84208	1.0504	1.2587	1.4671	1.6754	1.8837	2.0921	2.3004	2.5087	2.7171	2.9254	3.1337	3.3421	3.5504	3.7587	3.9671	4.1754	4.3838	4.5921	4.8004	5.0087	5.2171	5.4254	5.6337	5.8421	6.0504	6.2587	6.4671	6.6754	6.8838	7.0921	7.3004	7.5087	7.7171	7.9254	8.1337	8.3421	8.5504	8.7587	8.9671	9.1754	9.3837	9.5921	9.8004	10.0087	10.2171
time 55R
0	0.20833	0.41875	0.63208	0.84041	1.0487	1.2571	1.4654	1.6737	1.8821	2.0904	2.2987	2.5071	2.7154	2.9237	3.1321	3.3404	3.5488	3.7571	3.9654	4.1737	4.3821	4.5904	4.7987	5.0071	5.2154	5.4237	5.6321	5.8404	6.0487	6.2571	6.4654	6.6737	6.8821	7.0904	7.2988	7.5071	7.7154	7.9238	8.1321	8.3404	8.5488	8.7571	8.9654	9.1737	9.3821	9.5904	9.7987	10.0071	10.2154
0	0.20833	0.42541	0.63375	0.84208	1.0504	1.2587	1.4671	1.6754	1.8837	2.0921	2.3004	2.5087	2.7171	2.9254	3.1337	3.3421	3.5504	3.7587	3.9671	4.1754	4.3838	4.5921	4.8004	5.0087	5.2171	5.4254	5.6337	5.8421	6.0504	6.2587	6.4671	6.6754	6.8838	7.0921	7.3004	7.5087	7.7171	7.9254	8.1337	8.3421	8.5504	8.7587	8.9671	9.1754	9.3837	9.5921	9.8004	10.0087	10.2171
0	0.20833	0.41875	0.63208	0.84041	1.0487	1.2571	1.4654	1.6737	1.8821	2.0904	2.2987	2.5071	2.7154	2.9237	3.1321	3.3404	3.5488	3.7571	3.9654	4.1737	4.3821	4.5904	4.7987	5.0071	5.2154	5.4237	5.6321	5.8404	6.0487	6.2571	6.4654	6.6737	6.8821	7.0904	7.2988	7.5071	7.7154	7.9238	8.1321	8.3404	8.5488	8.7571	8.9654	9.1737	9.3821	9.5904	9.7987	10.0071	10.2154
0	0.20833	0.41875	0.63208	0.84041	1.0487	1.2571	1.4654	1.6737	1.8821	2.0904	2.2987	2.5071	2.7154	2.9237	3.1321	3.3404	3.5488	3.7571	3.9654	4.1737	4.3821	4.5904	4.7987	5.0071	5.2154	5.4237	5.6321	5.8404	6.0487	6.2571	6.4654	6.6737	6.8821	7.0904	7.2988	7.5071	7.7154	7.9238	8.1321	8.3404	8.5488	8.7571	8.9654	9.1737	9.3821	9.5904	9.7987	10.0071	10.2154
0	0.20833	0.41875	0.63208	0.84041	1.0487	1.2571	1.4654	1.6737	1.8821	2.0904	2.2987	2.5071	2.7154	2.9237	3.1321	3.3404	3.5488	3.7571	3.9654	4.1737	4.3821	4.5904	4.7987	5.0071	5.2154	5.4237	5.6321	5.8404	6.0487	6.2571	6.4654	6.6737	6.8821	7.0904	7.2988	7.5071	7.7154	7.9238	8.1321	8.3404	8.5488	8.7571	8.9654	9.1737	9.3821	9.5904	9.7987	10.0071	10.2154
0	0.20833	0.42541	0.63375	0.84208	1.0504	1.2587	1.4671	1.6754	1.8837	2.0921	2.3004	2.5087	2.7171	2.9254	3.1337	3.3421	3.5504	3.7587	3.9671	4.1754	4.3838	4.5921	4.8004	5.0087	5.2171	5.4254	5.6337	5.8421	6.0504	6.2587	6.4671	6.6754	6.8838	7.0921	7.3004	7.5087	7.7171	7.9254	8.1337	8.3421	8.5504	8.7587	8.9671	9.1754	9.3837	9.5921	9.8004	10.0087	10.2171
0	0.20833	0.42541	0.63375	0.84208	1.0504	1.2587	1.4671	1.6754	1.8837	2.0921	2.3004	2.5087	2.7171	2.9254	3.1337	3.3421	3.5504	3.7587	3.9671	4.1754	4.3838	4.5921	4.8004	5.0087	5.2171	5.4254	5.6337	5.8421	6.0504	6.2587	6.4671	6.6754	6.8838	7.0921	7.3004	7.5087	7.7171	7.9254	8.1337	8.3421	8.5504	8.7587	8.9671	9.1754	9.3837	9.5921	9.8004	10.0087	10.2171
0	0.20833	0.42541	0.63375	0.84208	1.0504	1.2587	1.4671	1.6754	1.8837	2.0921	2.3004	2.5087	2.7171	2.9254	3.1337	3.3421	3.5504	3.7587	3.9671	4.1754	4.3838	4.5921	4.8004	5.0087	5.2171	5.4254	5.6337	5.8421	6.0504	6.2587	6.4671	6.6754	6.8838	7.0921	7.3004	7.5087	7.7171	7.9254	8.1337	8.3421	8.5504	8.7587	8.9671	9.1754	9.3837	9.5921	9.8004	10.0087	10.2171
time 20R
0	0.20833	0.41666	0.625	0.83333	1.0417	1.25	1.4583	1.6667	1.875	2.0833	2.2917	2.5	2.7083	2.9167	3.125	3.3333	3.5417	3.75	3.9583	4.1667	4.375	4.5833	4.7917	5	5.2083	5.4167	5.625	5.8333	6.0417	6.25	6.4583	6.6667	6.875	7.0833	7.2917	7.5	7.7083	7.9167	8.125	8.3333	8.5417	8.75	8.9583	9.1667	9.375	9.5833	9.7917	10	10.2083
0	0.20833	0.41666	0.625	0.83333	1.0417	1.25	1.4583	1.6667	1.875	2.0833	2.2917	2.5	2.7083	2.9167	3.125	3.3333	3.5417	3.75	3.9583	4.1667	4.375	4.5833	4.7917	5	5.2083	5.4167	5.625	5.8333	6.0417	6.25	6.4583	6.6667	6.875	7.0833	7.2917	7.5	7.7083	7.9167	8.125	8.3333	8.5417	8.75	8.9583	9.1667	9.375	9.5833	9.7917	10	10.2083
0	0.20833	0.41666	0.625	0.83333	1.0417	1.25	1.4583	1.6667	1.875	2.0833	2.2917	2.5	2.7083	2.9167	3.125	3.3333	3.5417	3.75	3.9583	4.1667	4.375	4.5833	4.7917	5	5.2083	5.4167	5.625	5.8333	6.0417	6.25	6.4583	6.6667	6.875	7.0833	7.2917	7.5	7.7083	7.9167	8.125	8.3333	8.5417	8.75	8.9583	9.1667	9.375	9.5833	9.7917	10	10.2083
0	0.20833	0.41666	0.625	0.83333	1.0417	1.25	1.4583	1.6667	1.875	2.0833	2.2917	2.5	2.7083	2.9167	3.125	3.3333	3.5417	3.75	3.9583	4.1667	4.375	4.5833	4.7917	5	5.2083	5.4167	5.625	5.8333	6.0417	6.25	6.4583	6.6667	6.875	7.0833	7.2917	7.5	7.7083	7.9167	8.125	8.3333	8.5417	8.75	8.9583	9.1667	9.375	9.5833	9.7917	10	10.2083
0	0.20833	0.42541	0.63375	0.84208	1.0504	1.2587	1.4671	1.6754	1.8837	2.0921	2.3004	2.5087	2.7171	2.9254	3.1337	3.3421	3.5504	3.7587	3.9671	4.1754	4.3838	4.5921	4.8004	5.0087	5.2171	5.4254	5.6337	5.8421	6.0504	6.2587	6.4671	6.6754	6.8838	7.0921	7.3004	7.5087	7.7171	7.9254	8.1337	8.3421	8.5504	8.7587	8.9671	9.1754	9.3837	9.5921	9.8004	10.0087	10.2171
0	0.20833	0.42541	0.63375	0.84208	1.0504	1.2587	1.4671	1.6754	1.8837	2.0921	2.3004	2.5087	2.7171	2.9254	3.1337	3.3421	3.5504	3.7587	3.9671	4.1754	4.3838	4.5921	4.8004	5.0087	5.2171	5.4254	5.6337	5.8421	6.0504	6.2587	6.4671	6.6754	6.8838	7.0921	7.3004	7.5087	7.7171	7.9254	8.1337	8.3421	8.5504	8.7587	8.9671	9.1754	9.3837	9.5921	9.8004	10.0087	10.2171
0	0.20833	0.42541	0.63375	0.84208	1.0504	1.2587	1.4671	1.6754	1.8837	2.0921	2.3004	2.5087	2.7171	2.9254	3.1337	3.3421	3.5504	3.7587	3.9671	4.1754	4.3838	4.5921	4.8004	5.0087	5.2171	5.4254	5.6337	5.8421	6.0504	6.2587	6.4671	6.6754	6.8838	7.0921	7.3004	7.5087	7.7171	7.9254	8.1337	8.3421	8.5504	8.7587	8.9671	9.1754	9.3837	9.5921	9.8004	10.0087	10.2171
0	0.20833	0.42541	0.63375	0.84208	1.0504	1.2587	1.4671	1.6754	1.8837	2.0921	2.3004	2.5087	2.7171	2.9254	3.1337	3.3421	3.5504	3.7587	3.9671	4.1754	4.3838	4.5921	4.8004	5.0087	5.2171	5.4254	5.6337	5.8421	6.0504	6.2587	6.4671	6.6754	6.8838	7.0921	7.3004	7.5087	7.7171	7.9254	8.1337	8.3421	8.5504	8.7587	8.9671	9.1754	9.3837	9.5921	9.8004	10.0087	10.2171
OD 80R
0.63759	0.72675	0.86134	0.9639	0.9092	0.83264	0.72931	0.68669	0.56514	0.50749	0.42908	0.35794	0.31061	0.27043	0.23047	0.2063	0.1743	0.15741	0.13126	0.11849	0.10367	0.10155	0.096742	0.090527	0.083292	0.071176	0.069643	0.067641	0.05949	0.061401	0.059791	0.057455	0.059497	0.05293	0.058076	0.059355	0.059103	0.058112	0.059535	0.059771	0.05748	0.057437	0.059139	0.064855	0.058834	0.066663	0.067597	0.072773	0.076584	0.083946
0.076792	0.116	0.13809	0.15919	0.15606	0.12901	0.11724	0.10824	0.097863	0.075613	0.065513	0.052585	0.041975	0.028487	0.020591	0.013551	0.0095939	0.00077468	-0.011189	-0.0093084	-0.0047418	-0.0031681	-0.014368	-0.017183	-0.021922	-0.023202	-0.019748	-0.016525	-0.011789	-0.0057291	-0.010652	-0.021197	-0.024098	-0.036863	-0.026834	-0.016971	-0.021485	-0.033651	-0.018482	-0.0059879	-0.0045854	-0.011977	-0.003397	-0.0053179	0.0067546	0.0082666	0.018349	0.016133	0.03338	0.046708
0.63052	0.71476	0.83528	0.97262	0.94019	0.85963	0.77451	0.67993	0.57677	0.47689	0.41661	0.34563	0.30217	0.25765	0.22535	0.20622	0.18241	0.16236	0.14719	0.1314	0.12055	0.11635	0.11131	0.10663	0.09977	0.094829	0.09005	0.084799	0.080007	0.07797	0.076903	0.074479	0.071277	0.069433	0.067932	0.066375	0.064425	0.063094	0.064746	0.065632	0.066784	0.065725	0.06534	0.064817	0.0657	0.06593	0.069832	0.071721	0.072083	0.073702
0.64465	0.74441	0.88897	0.95424	0.88635	0.80856	0.69479	0.6983	0.55567	0.53007	0.45081	0.3687	0.31932	0.2851	0.2301	0.20563	0.1687	0.15224	0.11769	0.10773	0.08741	0.088068	0.082523	0.074629	0.066843	0.04899	0.048248	0.050403	0.039747	0.045043	0.042787	0.040759	0.047299	0.037902	0.048224	0.052257	0.053595	0.053378	0.054087	0.053056	0.046675	0.049155	0.052294	0.0644	0.051978	0.066593	0.067155	0.073821	0.080697	0.094659
0.080113	0.1222	0.14859	0.17955	0.17228	0.15105	0.1217	0.12563	0.10564	0.084429	0.070885	0.058632	0.055391	0.042768	0.035833	0.028805	0.029302	0.0055528	-0.0092588	-0.0045159	0.0049727	0.0074414	-0.011233	-0.016692	-0.024704	-0.028144	-0.019316	-0.0085263	-0.0016685	0.010243	0.0029054	-0.022428	-0.026716	-0.047115	-0.0315	-0.014399	-0.025535	-0.055494	-0.032016	-0.010747	-0.016225	-0.031601	-0.016167	-0.020799	-0.0035525	-0.00088379	0.0017027	0.0038471	0.033951	0.054028
0.07347	0.11355	0.12688	0.13755	0.13499	0.10742	0.11199	0.094119	0.087821	0.065834	0.059508	0.042863	0.027396	0.018112	0.0068685	-0.00045707	-0.0095304	-0.0064669	-0.011027	-0.013189	-0.012818	-0.014253	-0.016533	-0.018681	-0.019253	-0.020449	-0.021863	-0.022594	-0.022919	-0.02371	-0.023717	-0.022887	-0.022731	-0.021891	-0.019952	-0.017136	-0.013606	-0.011328	-0.0045164	0.0022915	0.0070004	0.0076632	0.013108	0.014181	0.019393	0.019429	0.03576	0.029999	0.030154	0.038839
OD 55R
0.58285	0.65065	0.74456	0.81041	0.76729	0.70563	0.62715	0.54732	0.47674	0.4174	0.37079	0.33014	0.29597	0.26161	0.23318	0.2141	0.19323	0.17486	0.16068	0.14692	0.13708	0.12772	0.11968	0.11288	0.11074	0.10665	0.10456	0.10235	0.099725	0.099618	0.10013	0.10069	0.10236	0.10508	0.10798	0.11411	0.1204	0.12881	0.13786	0.14717	0.15711	0.16773	0.18048	0.19413	0.20893	0.22353	0.24041	0.25552	0.27374	0.29354
0.11279	0.13388	0.15972	0.17029	0.16398	0.15752	0.146	0.13414	0.12363	0.10888	0.10371	0.093408	0.084575	0.074683	0.067111	0.059707	0.052632	0.044096	0.041909	0.036493	0.032106	0.028332	0.024638	0.021463	0.018416	0.015185	0.012617	0.010729	0.0081077	0.0060299	0.004599	0.0025852	0.001243	-0.00033249	-0.0015107	-0.0025064	-0.0038035	-0.0048534	-0.0055184	-0.0065123	-0.0075897	-0.0079428	-0.0087006	-0.0092727	-0.0099189	-0.01035	-0.010424	-0.011401	-0.011382	-0.011735
0.62204	0.66229	0.76962	0.82947	0.79574	0.72514	0.65345	0.55902	0.4949	0.43979	0.39081	0.35263	0.31292	0.27752	0.24476	0.22555	0.20242	0.18439	0.17056	0.15616	0.14776	0.13945	0.12951	0.12238	0.12104	0.11679	0.11389	0.11206	0.11061	0.11139	0.11164	0.11246	0.11481	0.11682	0.12084	0.12561	0.13121	0.13685	0.14461	0.15331	0.16119	0.17266	0.18216	0.19284	0.2035	0.21547	0.22814	0.24248	0.25796	0.275
0.51472	0.59787	0.71597	0.78607	0.73177	0.67315	0.59732	0.51722	0.43847	0.38011	0.32448	0.27602	0.24429	0.21329	0.18659	0.16704	0.1476	0.12796	0.11396	0.1008	0.087724	0.079734	0.07064	0.064539	0.06268	0.058147	0.056259	0.05331	0.052046	0.051669	0.050797	0.050797	0.051349	0.053092	0.056172	0.062099	0.069101	0.077061	0.08662	0.096411	0.10649	0.11785	0.13496	0.14865	0.168	0.1856	0.21053	0.23023	0.25394	0.27613
0.6118	0.68202	0.75211	0.80011	0.77092	0.71684	0.62599	0.55861	0.49316	0.43763	0.38919	0.35654	0.32161	0.29533	0.26876	0.24506	0.2267	0.21176	0.19725	0.1852	0.17463	0.1654	0.1581	0.15069	0.14775	0.1446	0.14225	0.13902	0.13781	0.1378	0.13796	0.13876	0.14092	0.14341	0.14761	0.15284	0.1601	0.17154	0.18117	0.19054	0.20359	0.21452	0.22667	0.23953	0.254	0.26673	0.28127	0.29485	0.3084	0.32683
0.12353	0.1439	0.17056	0.18014	0.17446	0.16624	0.15536	0.14113	0.13075	0.11641	0.10869	0.098199	0.090268	0.079825	0.072799	0.066008	0.058234	0.050192	0.048181	0.043345	0.038911	0.035448	0.031673	0.028612	0.025954	0.022469	0.020481	0.018828	0.015924	0.014427	0.012751	0.011344	0.0097802	0.0088867	0.0075016	0.0066081	0.0057704	0.0047539	0.0040837	0.003704	0.0027434	0.0025647	0.0023525	0.0019839	0.0017605	0.0016264	0.0019392	0.00084456	0.001202	0.00088924
0.11219	0.13123	0.16393	0.17831	0.17212	0.16326	0.15116	0.13636	0.12395	0.10914	0.10219	0.090803	0.081245	0.070292	0.061271	0.053296	0.045335	0.036677	0.033888	0.028194	0.023749	0.019768	0.015904	0.012795	0.0097739	0.0067815	0.0042829	0.0019877	-0.00036563	-0.0024575	-0.003852	-0.0055371	-0.007106	-0.0082681	-0.009837	-0.010709	-0.011842	-0.012858	-0.013643	-0.014573	-0.015444	-0.015996	-0.016694	-0.01742	-0.018146	-0.018553	-0.018945	-0.019657	-0.019744	-0.020267
0.10264	0.12298	0.14473	0.15294	0.14897	0.14282	0.13646	0.12592	0.11725	0.10448	0.099224	0.090582	0.0825	0.074111	0.06719	0.060815	0.053453	0.045291	0.043544	0.037983	0.033849	0.030328	0.026167	0.022726	0.019619	0.016378	0.013551	0.01143	0.0087762	0.0068291	0.0047219	0.0025214	0.0010544	-0.00077266	-0.002373	-0.0038134	-0.0050003	-0.0064806	-0.0076009	-0.0085878	-0.0098681	-0.010575	-0.011415	-0.012349	-0.013389	-0.014016	-0.014562	-0.015549	-0.015643	-0.016136
OD 20R
0.62423	0.72557	0.84391	0.87613	0.84804	0.82328	0.7871	0.74442	0.69837	0.66799	0.63386	0.6013	0.56893	0.53702	0.50438	0.47253	0.44889	0.42191	0.39406	0.36778	0.34818	0.32767	0.30537	0.28807	0.26971	0.25269	0.23733	0.22296	0.20755	0.19844	0.18784	0.17641	0.16576	0.15739	0.14732	0.13985	0.13267	0.12396	0.11781	0.1129	0.10655	0.10028	0.096065	0.091388	0.087471	0.082724	0.078562	0.076003	0.072125	0.068423
0.62002	0.73415	0.87108	0.91358	0.89002	0.85072	0.80732	0.76011	0.70241	0.67332	0.6328	0.59571	0.55471	0.51434	0.47627	0.44086	0.4244	0.39502	0.3628	0.33458	0.3147	0.29161	0.26838	0.25081	0.23132	0.21162	0.1963	0.18057	0.16494	0.15705	0.14661	0.13689	0.12549	0.11566	0.1067	0.099221	0.093011	0.084052	0.078452	0.074736	0.068781	0.063487	0.060992	0.056615	0.052873	0.049386	0.046383	0.043761	0.040936	0.038645
0.61999	0.68839	0.78188	0.80178	0.78022	0.75952	0.73271	0.70233	0.65899	0.64028	0.60995	0.58067	0.54714	0.52233	0.4959	0.46105	0.44332	0.41946	0.3937	0.3692	0.35584	0.33456	0.31443	0.30001	0.28455	0.26476	0.2521	0.23847	0.22361	0.21497	0.20541	0.19513	0.18409	0.17552	0.16445	0.15833	0.15046	0.14075	0.13388	0.12957	0.12369	0.11764	0.11383	0.10737	0.10367	0.099297	0.094384	0.090014	0.08604	0.082079
0.63269	0.748	0.86654	0.9153	0.88005	0.8517	0.81509	0.77481	0.73754	0.69901	0.65894	0.62931	0.60209	0.56763	0.53834	0.51165	0.47894	0.45238	0.42647	0.40003	0.37574	0.35476	0.33226	0.316	0.29539	0.27651	0.2638	0.24964	0.23377	0.22163	0.21169	0.19865	0.18817	0.18029	0.16908	0.16168	0.15432	0.14594	0.13955	0.1335	0.12717	0.12146	0.11529	0.10931	0.10528	0.10086	0.0963	0.093262	0.089702	0.08589
0.11228	0.13388	0.16533	0.17564	0.16926	0.16494	0.15858	0.15073	0.14063	0.13326	0.12593	0.11798	0.11328	0.10388	0.098373	0.092301	0.085736	0.078648	0.075442	0.070024	0.065112	0.061137	0.055705	0.052556	0.049156	0.044799	0.040895	0.038517	0.034687	0.031245	0.029699	0.026362	0.023853	0.021816	0.019406	0.017125	0.014791	0.013422	0.011391	0.0097853	0.0074242	0.0061564	0.0040234	0.0028783	0.0020068	0.0001885	-0.00104	-0.0024658	-0.0034632	-0.0049101
0.090109	0.11449	0.14847	0.15679	0.15303	0.15033	0.14264	0.13684	0.12643	0.1203	0.10899	0.10388	0.097058	0.089295	0.083136	0.076594	0.069519	0.063461	0.057276	0.052695	0.047223	0.043023	0.038238	0.034726	0.030424	0.026072	0.021949	0.019302	0.015688	0.011259	0.009401	0.0066776	0.0038779	0.0019435	-0.00090712	-0.0038087	-0.0062775	-0.0076265	-0.0099171	-0.011521	-0.013633	-0.015084	-0.017756	-0.018596	-0.019411	-0.021421	-0.023279	-0.024323	-0.025697	-0.027581
0.12502	0.15084	0.18208	0.18883	0.18252	0.17978	0.17086	0.16235	0.15422	0.14617	0.1369	0.12916	0.12203	0.11395	0.10759	0.10135	0.093526	0.088538	0.082828	0.077152	0.071844	0.068237	0.062398	0.058097	0.054707	0.04978	0.046486	0.042954	0.039095	0.036013	0.033821	0.030534	0.028043	0.025961	0.022524	0.021156	0.019087	0.01678	0.014868	0.012983	0.010812	0.0088654	0.0070687	0.0053673	0.0047004	0.0033121	0.001529	0.00035846	-0.0008257	-0.0020643
0.12171	0.13747	0.16459	0.17745	0.17312	0.16726	0.16074	0.15255	0.14228	0.13156	0.12976	0.12092	0.12086	0.10933	0.10421	0.10062	0.092643	0.0843	0.084258	0.079882	0.075619	0.071399	0.067065	0.064744	0.061747	0.058174	0.055079	0.052546	0.049536	0.046834	0.044471	0.04229	0.0398	0.037971	0.036086	0.034271	0.032344	0.030824	0.028967	0.027954	0.026153	0.024718	0.023762	0.022017	0.020554	0.0194	0.018106	0.016727	0.016024	0.014786
[truncated: 46 more columns]
