# Supplementary material for: Delayed antibiotic exposure induces population collapse in enterococcal communities with drug-resistant subpopulations
Source: eLife journal article supplement (doi:10.7554/elife.52813), 2020-03-23
Supplement: supp [file elife-52813-supp-v1.zip › elife_poa_e52813_Figure_3_source_data_2.xlsx]

## Sheet: Sheet1
Data below is given as matrices, with each column a time point and each row a replicate (or the mean over replicates).
Matrices correspond to time (for each of the 3 resistance fractions) and to OD (for each of the 3 resistance fractions)
(Data includes only every 500th time step to reduce file size)
time R35
0	0.20833	0.41666	0.625	0.83333	1.0417	1.25	1.4583	1.6667	1.875	2.0833	2.2917	2.5	2.7083	2.9167	3.125	3.3333	3.5417	3.75	3.9583	4.1667	4.375	4.5833	4.7917	5	5.2083	5.4167	5.625	5.8333	6.0417	6.25	6.4583	6.6667	6.875	7.0833	7.2917	7.5	7.7083	7.9167	8.125	8.3333	8.5417	8.75	8.9583	9.1667	9.375	9.5833	9.7917	10	10.2083
0	0.20833	0.41666	0.625	0.83333	1.0417	1.25	1.4583	1.6667	1.875	2.0833	2.2917	2.5	2.7083	2.9167	3.125	3.3333	3.5417	3.75	3.9583	4.1667	4.375	4.5833	4.7917	5	5.2083	5.4167	5.625	5.8333	6.0417	6.25	6.4583	6.6667	6.875	7.0833	7.2917	7.5	7.7083	7.9167	8.125	8.3333	8.5417	8.75	8.9583	9.1667	9.375	9.5833	9.7917	10	10.2083
0	0.20833	0.41666	0.625	0.83333	1.0417	1.25	1.4583	1.6667	1.875	2.0833	2.2917	2.5	2.7083	2.9167	3.125	3.3333	3.5417	3.75	3.9583	4.1667	4.375	4.5833	4.7917	5	5.2083	5.4167	5.625	5.8333	6.0417	6.25	6.4583	6.6667	6.875	7.0833	7.2917	7.5	7.7083	7.9167	8.125	8.3333	8.5417	8.75	8.9583	9.1667	9.375	9.5833	9.7917	10	10.2083
0	0.20833	0.41666	0.625	0.83333	1.0417	1.25	1.4583	1.6667	1.875	2.0833	2.2917	2.5	2.7083	2.9167	3.125	3.3333	3.5417	3.75	3.9583	4.1667	4.375	4.5833	4.7917	5	5.2083	5.4167	5.625	5.8333	6.0417	6.25	6.4583	6.6667	6.875	7.0833	7.2917	7.5	7.7083	7.9167	8.125	8.3333	8.5417	8.75	8.9583	9.1667	9.375	9.5833	9.7917	10	10.2083
0	0.20833	0.41666	0.625	0.83333	1.0417	1.25	1.4583	1.6667	1.875	2.0833	2.2917	2.5	2.7083	2.9167	3.125	3.3333	3.5417	3.75	3.9583	4.1667	4.375	4.5833	4.7917	5	5.2083	5.4167	5.625	5.8333	6.0417	6.25	6.4583	6.6667	6.875	7.0833	7.2917	7.5	7.7083	7.9167	8.125	8.3333	8.5417	8.75	8.9583	9.1667	9.375	9.5833	9.7917	10	10.2083
0	0.20833	0.41666	0.625	0.83333	1.0417	1.25	1.4583	1.6667	1.875	2.0833	2.2917	2.5	2.7083	2.9167	3.125	3.3333	3.5417	3.75	3.9583	4.1667	4.375	4.5833	4.7917	5	5.2083	5.4167	5.625	5.8333	6.0417	6.25	6.4583	6.6667	6.875	7.0833	7.2917	7.5	7.7083	7.9167	8.125	8.3333	8.5417	8.75	8.9583	9.1667	9.375	9.5833	9.7917	10	10.2083
0	0.20833	0.41666	0.625	0.83333	1.0417	1.25	1.4583	1.6667	1.875	2.0833	2.2917	2.5	2.7083	2.9167	3.125	3.3333	3.5417	3.75	3.9583	4.1667	4.375	4.5833	4.7917	5	5.2083	5.4167	5.625	5.8333	6.0417	6.25	6.4583	6.6667	6.875	7.0833	7.2917	7.5	7.7083	7.9167	8.125	8.3333	8.5417	8.75	8.9583	9.1667	9.375	9.5833	9.7917	10	10.2083
0	0.20833	0.41666	0.625	0.83333	1.0417	1.25	1.4583	1.6667	1.875	2.0833	2.2917	2.5	2.7083	2.9167	3.125	3.3333	3.5417	3.75	3.9583	4.1667	4.375	4.5833	4.7917	5	5.2083	5.4167	5.625	5.8333	6.0417	6.25	6.4583	6.6667	6.875	7.0833	7.2917	7.5	7.7083	7.9167	8.125	8.3333	8.5417	8.75	8.9583	9.1667	9.375	9.5833	9.7917	10	10.2083
time R11
0	0.20833	0.41666	0.625	0.83333	1.0417	1.25	1.4583	1.6667	1.875	2.0833	2.2917	2.5	2.7083	2.9167	3.125	3.3333	3.5417	3.75	3.9583	4.1667	4.375	4.5833	4.7917	5	5.2083	5.4167	5.625	5.8333	6.0417	6.25	6.4583	6.6667	6.875	7.0833	7.2917	7.5	7.7083	7.9167	8.125	8.3333	8.5417	8.75	8.9583	9.1667	9.375	9.5833	9.7917	10	10.2083
0	0.20833	0.41666	0.625	0.83333	1.0417	1.25	1.4583	1.6667	1.875	2.0833	2.2917	2.5	2.7083	2.9167	3.125	3.3333	3.5417	3.75	3.9583	4.1667	4.375	4.5833	4.7917	5	5.2083	5.4167	5.625	5.8333	6.0417	6.25	6.4583	6.6667	6.875	7.0833	7.2917	7.5	7.7083	7.9167	8.125	8.3333	8.5417	8.75	8.9583	9.1667	9.375	9.5833	9.7917	10	10.2083
0	0.20833	0.41666	0.625	0.83333	1.0417	1.25	1.4583	1.6667	1.875	2.0833	2.2917	2.5	2.7083	2.9167	3.125	3.3333	3.5417	3.75	3.9583	4.1667	4.375	4.5833	4.7917	5	5.2083	5.4167	5.625	5.8333	6.0417	6.25	6.4583	6.6667	6.875	7.0833	7.2917	7.5	7.7083	7.9167	8.125	8.3333	8.5417	8.75	8.9583	9.1667	9.375	9.5833	9.7917	10	10.2083
0	0.20833	0.41666	0.625	0.83333	1.0417	1.25	1.4583	1.6667	1.875	2.0833	2.2917	2.5	2.7083	2.9167	3.125	3.3333	3.5417	3.75	3.9583	4.1667	4.375	4.5833	4.7917	5	5.2083	5.4167	5.625	5.8333	6.0417	6.25	6.4583	6.6667	6.875	7.0833	7.2917	7.5	7.7083	7.9167	8.125	8.3333	8.5417	8.75	8.9583	9.1667	9.375	9.5833	9.7917	10	10.2083
0	0.20833	0.41666	0.625	0.83333	1.0417	1.25	1.4583	1.6667	1.875	2.0833	2.2917	2.5	2.7083	2.9167	3.125	3.3333	3.5417	3.75	3.9583	4.1667	4.375	4.5833	4.7917	5	5.2083	5.4167	5.625	5.8333	6.0417	6.25	6.4583	6.6667	6.875	7.0833	7.2917	7.5	7.7083	7.9167	8.125	8.3333	8.5417	8.75	8.9583	9.1667	9.375	9.5833	9.7917	10	10.2083
0	0.20833	0.41666	0.625	0.83333	1.0417	1.25	1.4583	1.6667	1.875	2.0833	2.2917	2.5	2.7083	2.9167	3.125	3.3333	3.5417	3.75	3.9583	4.1667	4.375	4.5833	4.7917	5	5.2083	5.4167	5.625	5.8333	6.0417	6.25	6.4583	6.6667	6.875	7.0833	7.2917	7.5	7.7083	7.9167	8.125	8.3333	8.5417	8.75	8.9583	9.1667	9.375	9.5833	9.7917	10	10.2083
0	0.20833	0.41666	0.625	0.83333	1.0417	1.25	1.4583	1.6667	1.875	2.0833	2.2917	2.5	2.7083	2.9167	3.125	3.3333	3.5417	3.75	3.9583	4.1667	4.375	4.5833	4.7917	5	5.2083	5.4167	5.625	5.8333	6.0417	6.25	6.4583	6.6667	6.875	7.0833	7.2917	7.5	7.7083	7.9167	8.125	8.3333	8.5417	8.75	8.9583	9.1667	9.375	9.5833	9.7917	10	10.2083
0	0.20833	0.41666	0.625	0.83333	1.0417	1.25	1.4583	1.6667	1.875	2.0833	2.2917	2.5	2.7083	2.9167	3.125	3.3333	3.5417	3.75	3.9583	4.1667	4.375	4.5833	4.7917	5	5.2083	5.4167	5.625	5.8333	6.0417	6.25	6.4583	6.6667	6.875	7.0833	7.2917	7.5	7.7083	7.9167	8.125	8.3333	8.5417	8.75	8.9583	9.1667	9.375	9.5833	9.7917	10	10.2083
0	0.20833	0.41667	0.625	0.83333	1.0417	1.25	1.4583	1.6667	1.875	2.0833	2.2917	2.5	2.7083	2.9167	3.125	3.3333	3.5417	3.75	3.9583	4.1667	4.375	4.5833	4.7917	5	5.2083	5.4167	5.625	5.8333	6.0417	6.25	6.4583	6.6667	6.875	7.0833	7.2917	7.5	7.7083	7.9167	8.125	8.3333	8.5417	8.75	8.9583	9.1667	9.375	9.5833	9.7917	10	10.2083
0	0.20833	0.41667	0.625	0.83333	1.0417	1.25	1.4583	1.6667	1.875	2.0833	2.2917	2.5	2.7083	2.9167	3.125	3.3333	3.5417	3.75	3.9583	4.1667	4.375	4.5833	4.7917	5	5.2083	5.4167	5.625	5.8333	6.0417	6.25	6.4583	6.6667	6.875	7.0833	7.2917	7.5	7.7083	7.9167	8.125	8.3333	8.5417	8.75	8.9583	9.1667	9.375	9.5833	9.7917	10	10.2083
time R2
0	0.20833	0.41666	0.625	0.83333	1.0417	1.25	1.4583	1.6667	1.875	2.0833	2.2917	2.5	2.7083	2.9167	3.125	3.3333	3.5417	3.75	3.9583	4.1667	4.375	4.5833	4.7917	5	5.2083	5.4167	5.625	5.8333	6.0417	6.25	6.4583	6.6667	6.875	7.0833	7.2917	7.5	7.7083	7.9167	8.125	8.3333	8.5417	8.75	8.9583	9.1667	9.375	9.5833	9.7917	10	10.2083
0	0.20833	0.41666	0.625	0.83333	1.0417	1.25	1.4583	1.6667	1.875	2.0833	2.2917	2.5	2.7083	2.9167	3.125	3.3333	3.5417	3.75	3.9583	4.1667	4.375	4.5833	4.7917	5	5.2083	5.4167	5.625	5.8333	6.0417	6.25	6.4583	6.6667	6.875	7.0833	7.2917	7.5	7.7083	7.9167	8.125	8.3333	8.5417	8.75	8.9583	9.1667	9.375	9.5833	9.7917	10	10.2083
0	0.20833	0.41666	0.625	0.83333	1.0417	1.25	1.4583	1.6667	1.875	2.0833	2.2917	2.5	2.7083	2.9167	3.125	3.3333	3.5417	3.75	3.9583	4.1667	4.375	4.5833	4.7917	5	5.2083	5.4167	5.625	5.8333	6.0417	6.25	6.4583	6.6667	6.875	7.0833	7.2917	7.5	7.7083	7.9167	8.125	8.3333	8.5417	8.75	8.9583	9.1667	9.375	9.5833	9.7917	10	10.2083
0	0.20833	0.41666	0.625	0.83333	1.0417	1.25	1.4583	1.6667	1.875	2.0833	2.2917	2.5	2.7083	2.9167	3.125	3.3333	3.5417	3.75	3.9583	4.1667	4.375	4.5833	4.7917	5	5.2083	5.4167	5.625	5.8333	6.0417	6.25	6.4583	6.6667	6.875	7.0833	7.2917	7.5	7.7083	7.9167	8.125	8.3333	8.5417	8.75	8.9583	9.1667	9.375	9.5833	9.7917	10	10.2083
0	0.20833	0.41666	0.625	0.83333	1.0417	1.25	1.4583	1.6667	1.875	2.0833	2.2917	2.5	2.7083	2.9167	3.125	3.3333	3.5417	3.75	3.9583	4.1667	4.375	4.5833	4.7917	5	5.2083	5.4167	5.625	5.8333	6.0417	6.25	6.4583	6.6667	6.875	7.0833	7.2917	7.5	7.7083	7.9167	8.125	8.3333	8.5417	8.75	8.9583	9.1667	9.375	9.5833	9.7917	10	10.2083
0	0.20833	0.41666	0.625	0.83333	1.0417	1.25	1.4583	1.6667	1.875	2.0833	2.2917	2.5	2.7083	2.9167	3.125	3.3333	3.5417	3.75	3.9583	4.1667	4.375	4.5833	4.7917	5	5.2083	5.4167	5.625	5.8333	6.0417	6.25	6.4583	6.6667	6.875	7.0833	7.2917	7.5	7.7083	7.9167	8.125	8.3333	8.5417	8.75	8.9583	9.1667	9.375	9.5833	9.7917	10	10.2083
0	0.20833	0.41667	0.625	0.83333	1.0417	1.25	1.4583	1.6667	1.875	2.0833	2.2917	2.5	2.7083	2.9167	3.125	3.3333	3.5417	3.75	3.9583	4.1667	4.375	4.5833	4.7917	5	5.2083	5.4167	5.625	5.8333	6.0417	6.25	6.4583	6.6667	6.875	7.0833	7.2917	7.5	7.7083	7.9167	8.125	8.3333	8.5417	8.75	8.9583	9.1667	9.375	9.5833	9.7917	10	10.2083
0	0.20833	0.41667	0.625	0.83333	1.0417	1.25	1.4583	1.6667	1.875	2.0833	2.2917	2.5	2.7083	2.9167	3.125	3.3333	3.5417	3.75	3.9583	4.1667	4.375	4.5833	4.7917	5	5.2083	5.4167	5.625	5.8333	6.0417	6.25	6.4583	6.6667	6.875	7.0833	7.2917	7.5	7.7083	7.9167	8.125	8.3333	8.5417	8.75	8.9583	9.1667	9.375	9.5833	9.7917	10	10.2083
OD R35
0.57502	0.65523	0.73112	0.80851	0.88404	0.93454	0.96714	0.98798	0.98973	0.98739	0.9911	0.99504	1.0013	0.9929	0.98804	0.97994	0.98315	0.97804	0.98884	0.99643	0.99052	1.016	1.0133	1.0203	1.0281	1.0326	1.0123	1.0141	1.0181	1.0151	1.014	1.011	1.0008	1.0098	1.0168	0.99232	1.0194	1.0055	1.015	1.0058	0.98966	0.97253	0.96246	0.94212	0.92325	0.91602	0.88957	0.8633	0.85405	0.85479
0.20593	0.099021	0.13073	0.17584	0.19369	0.26195	0.34336	0.43895	0.53263	0.62265	0.70923	0.80341	0.93626	0.9765	1.0338	1.0631	1.063	1.0514	1.0437	1.0585	1.0288	1.0226	0.99721	0.97921	0.99005	0.97437	0.98375	1.0076	1.0234	1.0337	1.037	1.0438	1.0641	1.049	1.0461	1.0466	1.0665	1.052	1.0585	1.0623	1.0459	1.0486	1.0404	1.0186	0.98564	1.0067	1.0096	1.0126	1.0087	0.99857
0.57244	0.65934	0.74262	0.82272	0.91438	0.97021	1.0131	1.0438	1.0583	1.0486	1.067	1.0643	1.0638	1.0487	1.0397	1.0303	1.0301	1.0159	1.0265	1.0332	1.0362	1.0525	1.0442	1.068	1.0877	1.0959	1.0698	1.0674	1.0745	1.0838	1.0817	1.0785	1.0618	1.0748	1.0831	1.0636	1.1045	1.0975	1.106	1.0996	1.0891	1.0703	1.0552	1.0311	1.0182	1.013	0.99569	0.96584	0.96392	0.95548
0.59036	0.65093	0.74362	0.82417	0.89827	0.96431	0.99913	1.0169	1.0273	1.0254	1.0231	1.0379	1.0326	1.0217	1.0218	1.015	1.0152	1.0094	1.0166	1.0312	1.0286	1.0343	1.0475	1.0711	1.0797	1.073	1.0531	1.0429	1.0414	1.0318	1.0321	1.0347	1.0246	1.0284	1.0327	1.0165	1.0547	1.042	1.0465	1.0401	1.0221	1.0049	0.99145	0.97524	0.95598	0.94905	0.91604	0.89489	0.88704	0.88674
0.56226	0.65543	0.7071	0.77863	0.83945	0.86911	0.88921	0.90325	0.88361	0.88813	0.88323	0.88288	0.90746	0.90834	0.90267	0.89447	0.90415	0.90884	0.92343	0.92489	0.90674	0.96129	0.94809	0.92189	0.91683	0.92908	0.91388	0.93202	0.93825	0.92978	0.92819	0.91992	0.91599	0.92633	0.93473	0.89691	0.899	0.87718	0.89261	0.87761	0.85776	0.84243	0.84075	0.82003	0.79555	0.78603	0.75697	0.72918	0.7112	0.72216
0.13723	0.087479	0.096618	0.16151	0.17087	0.23724	0.30867	0.39364	0.49022	0.58802	0.63274	0.71821	0.94011	0.94907	1.0328	1.1224	1.0876	1.1433	1.1367	1.1514	1.0687	1.071	1.0622	1.0296	1.0352	1.0154	1.0001	1.0185	1.0155	1.017	1.013	1.0566	1.0963	1.0717	1.0735	1.055	1.0921	1.06	1.0863	1.0726	1.0452	1.0528	1.025	1.0122	1.0182	1.0035	1.0016	0.99679	1.0218	0.99211
0.10737	0.11945	0.14676	0.17765	0.21779	0.2644	0.33887	0.42009	0.49731	0.58317	0.6853	0.79135	0.88282	0.91611	0.98787	1.0333	1.0676	1.0318	1.0346	1.0389	1.0267	1.02	0.99465	0.99751	0.97959	0.92897	0.92986	0.94151	0.95403	0.96126	0.98145	0.99225	0.98968	0.97213	0.97267	0.98132	0.98014	0.96851	0.98583	0.98674	0.95758	0.97217	0.97626	0.96366	0.9631	0.95749	0.95892	0.95512	0.92406	0.92016
0.3732	0.090134	0.1488	0.18837	0.1924	0.28422	0.38254	0.50314	0.61036	0.69677	0.80967	0.90067	0.98584	1.0643	1.0807	1.0337	1.0339	0.97909	0.95971	0.98512	0.991	0.97669	0.93481	0.91056	0.95532	0.97876	1.0213	1.0627	1.1008	1.1229	1.1165	1.0825	1.1065	1.103	1.0921	1.1035	1.1272	1.1275	1.1033	1.1276	1.1348	1.1208	1.12	1.08	0.97563	1.0591	1.0684	1.086	1.0802	1.0834
OD R11
0.59072	0.6407	0.70154	0.77344	0.8166	0.87679	0.88416	0.84731	0.82045	0.74817	0.69247	0.64905	0.59413	0.53714	0.47904	0.4306	0.38853	0.34774	0.30927	0.27398	0.24609	0.21821	0.19534	0.1764	0.16278	0.14542	0.13597	0.12635	0.1191	0.11276	0.10852	0.10417	0.10257	0.10325	0.10216	0.10221	0.1045	0.10663	0.11223	0.11817	0.12339	0.13259	0.14161	0.15172	0.1663	0.1788	0.19331	0.21064	0.23123	0.24821
0.12277	0.13971	0.15345	0.17327	0.19153	0.1991	0.18783	0.16423	0.13919	0.11623	0.1002	0.087143	0.076736	0.069355	0.066776	0.067083	0.070196	0.077677	0.087911	0.10189	0.12089	0.14497	0.17298	0.20731	0.25183	0.29944	0.35786	0.42283	0.48976	0.56152	0.63547	0.70376	0.76708	0.82073	0.86172	0.88891	0.90196	0.90144	0.89809	0.8939	0.89682	0.88439	0.8805	0.87914	0.86877	0.8642	0.86905	0.85406	0.85707	0.86282
0.55807	0.6208	0.67362	0.74357	0.79271	0.84077	0.80604	0.74547	0.69301	0.63608	0.55076	0.47343	0.41842	0.3537	0.31431	0.26906	0.22821	0.1922	0.16004	0.13378	0.11135	0.093256	0.079871	0.069314	0.071145	0.061857	0.063136	0.063027	0.063034	0.06535	0.066322	0.067039	0.067359	0.070647	0.074295	0.075097	0.078575	0.08208	0.086522	0.093418	0.099333	0.10737	0.11409	0.12491	0.13556	0.14503	0.15737	0.1691	0.1848	0.20048
0.6655	0.707	0.77717	0.8571	0.92709	0.99395	0.96853	0.96712	0.90178	0.8319	0.76753	0.74734	0.65586	0.58351	0.50992	0.4608	0.40456	0.35536	0.31231	0.27563	0.24424	0.21858	0.19752	0.1771	0.16174	0.14837	0.13674	0.1274	0.11919	0.11204	0.10775	0.10376	0.10056	0.097794	0.095952	0.09465	0.094415	0.095011	0.096159	0.097929	0.10081	0.1053	0.11033	0.11672	0.12372	0.13249	0.14342	0.1559	0.16954	0.18548
0.56701	0.62644	0.69336	0.75032	0.80241	0.86151	0.89854	0.86534	0.85692	0.83705	0.82794	0.77088	0.69768	0.65743	0.59159	0.54817	0.52061	0.47584	0.43409	0.39791	0.36035	0.32554	0.29446	0.26425	0.23902	0.2151	0.19529	0.17762	0.16436	0.1523	0.14378	0.13611	0.13042	0.12698	0.12516	0.12445	0.12597	0.12899	0.13373	0.13906	0.14793	0.15908	0.17244	0.18775	0.20426	0.22173	0.24199	0.26774	0.29154	0.31467
0.081961	0.1025	0.11245	0.13087	0.15313	0.15131	0.1357	0.11364	0.086406	0.067973	0.052692	0.042561	0.032745	0.02439	0.020226	0.018779	0.019142	0.024424	0.030384	0.040384	0.051497	0.069566	0.091766	0.11479	0.15035	0.18814	0.23156	0.28801	0.34964	0.41961	0.49191	0.57109	0.64533	0.71171	0.76801	0.81139	0.84009	0.83202	0.83512	0.82575	0.8256	0.82086	0.81737	0.81099	0.79973	0.79697	0.78911	0.78314	0.78605	0.78754
0.15097	0.16054	0.17478	0.19746	0.21309	0.22671	0.21093	0.18856	0.16359	0.14252	0.12504	0.11017	0.098953	0.090414	0.086452	0.085694	0.088311	0.093349	0.10175	0.11413	0.12998	0.15053	0.17525	0.20553	0.24246	0.28649	0.33753	0.39658	0.46475	0.53705	0.61619	0.69817	0.77423	0.84186	0.89871	0.94267	0.96032	0.9568	0.95982	0.96069	0.95662	0.95193	0.94784	0.94216	0.93823	0.93525	0.9294	0.92872	0.92761	0.92585
0.15165	0.16696	0.17845	0.19999	0.22786	0.23269	0.22134	0.19993	0.17422	0.15146	0.13357	0.11921	0.10892	0.10108	0.096893	0.096383	0.098289	0.10372	0.11274	0.12565	0.14182	0.16404	0.1907	0.22124	0.25926	0.3031	0.35403	0.40989	0.46781	0.53013	0.597	0.66761	0.72315	0.77857	0.84449	0.86528	0.8809	0.87973	0.88234	0.88042	0.87502	0.87007	0.86608	0.86284	0.85804	0.85577	0.85259	0.84897	0.84856	0.84285
0.5723	0.62675	0.67603	0.72035	0.74893	0.80364	0.80966	0.78348	0.74996	0.68599	0.65052	0.6192	0.57971	0.53801	0.49467	0.44257	0.40561	0.36432	0.32703	0.29374	0.26327	0.23472	0.21098	0.19113	0.17532	0.15946	0.14792	0.13661	0.12772	0.12034	0.11406	0.11261	0.11149	0.11205	0.1132	0.11471	0.11815	0.12269	0.13125	0.13911	0.14642	0.15751	0.16736	0.17864	0.19985	0.21546	0.233	0.25139	0.27566	0.29197
0.1065	0.13046	0.14699	0.15929	0.17381	0.18335	0.18242	0.15942	0.13088	0.10821	0.090716	0.076494	0.06703	0.062179	0.062301	0.066013	0.075778	0.088174	0.10522	0.12864	0.15733	0.19121	0.2356	0.28762	0.35001	0.42287	0.50333	0.59233	0.68149	0.76103	0.82631	0.88258	0.92225	0.94093	0.93322	0.93351	0.93321	0.92646	0.92121	0.91566	0.90888	0.90228	0.89672	0.88303	0.88409	0.88732	0.88225	0.87406	0.87814	0.87689
OD R2
0.10248	0.11251	0.12886	0.1188	0.096656	0.077546	0.052312	0.036316	0.022709	0.011611	0.0013591	-0.0017317	-0.0016758	-0.007441	-0.01582	-0.0097628	-0.016948	-0.01824	-0.019468	-0.015688	-0.016403	-0.018642	-0.018409	-0.024937	-0.023511	-0.019108	-0.026655	-0.023391	-0.022723	-0.022869	-0.022964	-0.023501	-0.024833	-0.025414	-0.024948	-0.027761	-0.026857	-0.027159	-0.029554	-0.026729	-0.031862	-0.029414	-0.024109	-0.031686	-0.036955	-0.035555	-0.029382	-0.031646	-0.027945	-0.02698
0.62597	0.68962	0.76233	0.74238	0.67847	0.5982	0.51615	0.4357	0.36291	0.31497	0.27364	0.23939	0.20715	0.17906	0.15606	0.13619	0.12103	0.10677	0.094828	0.085139	0.07644	0.070244	0.063476	0.05769	0.052351	0.048126	0.043883	0.040248	0.036935	0.034124	0.03174	0.029499	0.027122	0.025433	0.023394	0.021257	0.020196	0.018697	0.017648	0.01635	0.015081	0.013822	0.012788	0.011566	0.010563	0.0096299	0.008576	0.0076302	0.0069967	0.0061646
0.63094	0.68658	0.75142	0.74362	0.69416	0.61508	0.55028	0.48797	0.40948	0.37258	0.32996	0.29151	0.25606	0.22008	0.19173	0.16552	0.147	0.12786	0.11145	0.099119	0.087142	0.080738	0.071277	0.063089	0.05543	0.049848	0.044077	0.039156	0.035078	0.031492	0.028427	0.025767	0.022131	0.020067	0.016892	0.013531	0.013099	0.010985	0.010291	0.0086989	0.0070011	0.0053708	0.0041447	0.0023053	0.0010856	-5.87e-05	-0.0017081	-0.0028563	-0.0035377	-0.0043987
0.68031	0.73948	0.80556	0.80159	0.73648	0.6634	0.57967	0.50451	0.43216	0.37785	0.33643	0.30042	0.26237	0.23084	0.20348	0.17974	0.16072	0.1435	0.12926	0.11689	0.10613	0.097085	0.088733	0.081603	0.075149	0.069753	0.064521	0.060093	0.056152	0.052399	0.049294	0.046353	0.043773	0.041299	0.039094	0.036961	0.035033	0.033386	0.03155	0.030049	0.028487	0.027121	0.025815	0.024607	0.023436	0.022357	0.021491	0.020363	0.019645	0.018676
0.13339	0.15392	0.17565	0.17156	0.14946	0.11577	0.07481	0.062674	0.045893	0.033963	0.019406	0.016925	0.0095043	0.0031621	-0.0023293	-0.0057052	-0.0091856	-0.012091	-0.013321	-0.015231	-0.017167	-0.01827	-0.018895	-0.019796	-0.020476	-0.021548	-0.021909	-0.022367	-0.022545	-0.02304	-0.02322	-0.023074	-0.023735	-0.023849	-0.024194	-0.024317	-0.024525	-0.024921	-0.025235	-0.025325	-0.025634	-0.025865	-0.026164	-0.026387	-0.026401	-0.026818	-0.02688	-0.02699	-0.027363	-0.027648
0.091519	0.086491	0.10793	0.092557	0.063787	0.057071	0.035447	0.010735	-0.0042412	-0.018605	-0.029443	-0.032396	-0.022049	-0.031081	-0.049193	-0.026525	-0.043815	-0.044119	-0.046063	-0.032308	-0.03217	-0.037449	-0.035895	-0.054437	-0.049211	-0.034781	-0.056867	-0.046448	-0.043821	-0.043717	-0.04383	-0.045376	-0.048624	-0.050105	-0.048367	-0.056648	-0.053713	-0.054175	-0.060959	-0.052093	-0.067207	-0.059675	-0.043487	-0.065893	-0.081571	-0.076862	-0.058214	-0.0648	-0.053323	-0.049997
0.56666	0.6428	0.73	0.68194	0.60478	0.51613	0.41849	0.31462	0.24707	0.19447	0.15455	0.12623	0.10302	0.086261	0.072984	0.063321	0.055372	0.048954	0.043777	0.039409	0.036052	0.032907	0.030418	0.028378	0.026472	0.024776	0.023051	0.021494	0.019576	0.018481	0.017498	0.016378	0.015462	0.014933	0.014195	0.013277	0.012457	0.011721	0.011102	0.010303	0.0097562	0.0089728	0.0084039	0.0077843	0.0071679	0.006591	0.0059447	0.0053843	0.0048832	0.0042166
0.082533	0.097114	0.10299	0.092295	0.076724	0.059794	0.046679	0.035538	0.026476	0.019474	0.014115	0.010275	0.0075176	0.0055956	0.0040611	0.0029422	0.0021556	0.0014896	0.00098054	0.00047454	0.00012776	-0.0002082	-0.0004365	-0.0005787	-0.0008469	-0.0009958	-0.0011908	-0.0013575	-0.0018027	-0.0018496	-0.0018419	-0.0020545	-0.0021415	-0.0022886	-0.0022845	-0.0023162	-0.002334	-0.0023806	-0.0024669	-0.0027686	-0.0027444	-0.0027032	-0.0026759	-0.0027795	-0.0028926	-0.002984	-0.0030507	-0.0031466	-0.0031494	-0.0032952
[truncated: 46 more columns]
