# Supplementary material for: Delayed antibiotic exposure induces population collapse in enterococcal communities with drug-resistant subpopulations
Source: eLife journal article supplement (doi:10.7554/elife.52813), 2020-03-23
Supplement: supp [file elife-52813-supp-v1.zip › elife_poa_e52813_Figure_4_source_data_1.xlsx]

## Sheet: Sheet1
Data below is given as matrices, with each column a time point and each row a replicate (or the mean over replicates).
Matrices correspond to time (for each of the 4 subpanels) and to OD (for each of the 4 subpanels)
(Data includes only every 500th time step to reduce file size)
time
0	0.20833	0.41667	0.625	0.83333	1.0417	1.25	1.4583	1.6667	1.875	2.0833	2.2917	2.5	2.7083	2.9167	3.125	3.3333	3.5417	3.75	3.9583	4.1667	4.375	4.5833	4.7917	5	5.2083	5.4167	5.625	5.8333	6.0417	6.25	6.4583	6.6667	6.875	7.0833	7.2917	7.5	7.7083	7.9167	8.125	8.3333	8.5417	8.75	8.9583	9.1667	9.375	9.5833	9.7917	10	10.2083
0	0.20833	0.425	0.63333	0.84167	1.05	1.2583	1.4667	1.675	1.8833	2.0917	2.3	2.5083	2.7167	2.925	3.1333	3.3417	3.55	3.7583	3.9667	4.175	4.3833	4.5917	4.8	5.0083	5.2167	5.425	5.6333	5.8417	6.05	6.2583	6.4667	6.675	6.8833	7.0917	7.3	7.5083	7.7167	7.925	8.1333	8.3417	8.55	8.7583	8.9667	9.175	9.3833	9.5917	9.8	10.0083	10.2167
0	0.20833	0.41667	0.625	0.83333	1.0417	1.25	1.4583	1.6667	1.875	2.0833	2.2917	2.5	2.7083	2.9167	3.125	3.3333	3.5417	3.75	3.9583	4.1667	4.375	4.5833	4.7917	5	5.2083	5.4167	5.625	5.8333	6.0417	6.25	6.4583	6.6667	6.875	7.0833	7.2917	7.5	7.7083	7.9167	8.125	8.3333	8.5417	8.75	8.9583	9.1667	9.375	9.5833	9.7917	10	10.2083
0	0.20833	0.41667	0.625	0.83333	1.0417	1.25	1.4583	1.6667	1.875	2.0833	2.2917	2.5	2.7083	2.9167	3.125	3.3333	3.5417	3.75	3.9583	4.1667	4.375	4.5833	4.7917	5	5.2083	5.4167	5.625	5.8333	6.0417	6.25	6.4583	6.6667	6.875	7.0833	7.2917	7.5	7.7083	7.9167	8.125	8.3333	8.5417	8.75	8.9583	9.1667	9.375	9.5833	9.7917	10	10.2083
0	0.20833	0.41667	0.625	0.83333	1.0417	1.25	1.4583	1.6667	1.875	2.0833	2.2917	2.5	2.7083	2.9167	3.125	3.3333	3.5417	3.75	3.9583	4.1667	4.375	4.5833	4.7917	5	5.2083	5.4167	5.625	5.8333	6.0417	6.25	6.4583	6.6667	6.875	7.0833	7.2917	7.5	7.7083	7.9167	8.125	8.3333	8.5417	8.75	8.9583	9.1667	9.375	9.5833	9.7917	10	10.2083
0	0.20833	0.425	0.63333	0.84167	1.05	1.2583	1.4667	1.675	1.8833	2.0917	2.3	2.5083	2.7167	2.925	3.1333	3.3417	3.55	3.7583	3.9667	4.175	4.3833	4.5917	4.8	5.0083	5.2167	5.425	5.6333	5.8417	6.05	6.2583	6.4667	6.675	6.8833	7.0917	7.3	7.5083	7.7167	7.925	8.1333	8.3417	8.55	8.7583	8.9667	9.175	9.3833	9.5917	9.8	10.0083	10.2167
0	0.20833	0.425	0.63333	0.84167	1.05	1.2583	1.4667	1.675	1.8833	2.0917	2.3	2.5083	2.7167	2.925	3.1333	3.3417	3.55	3.7583	3.9667	4.175	4.3833	4.5917	4.8	5.0083	5.2167	5.425	5.6333	5.8417	6.05	6.2583	6.4667	6.675	6.8833	7.0917	7.3	7.5083	7.7167	7.925	8.1333	8.3417	8.55	8.7583	8.9667	9.175	9.3833	9.5917	9.8	10.0083	10.2167
0	0.20833	0.425	0.63333	0.84167	1.05	1.2583	1.4667	1.675	1.8833	2.0917	2.3	2.5083	2.7167	2.925	3.1333	3.3417	3.55	3.7583	3.9667	4.175	4.3833	4.5917	4.8	5.0083	5.2167	5.425	5.6333	5.8417	6.05	6.2583	6.4667	6.675	6.8833	7.0917	7.3	7.5083	7.7167	7.925	8.1333	8.3417	8.55	8.7583	8.9667	9.175	9.3833	9.5917	9.8	10.0083	10.2167
time
0	0.20833	0.425	0.63333	0.84167	1.05	1.2583	1.4667	1.675	1.8833	2.0917	2.3	2.5083	2.7167	2.925	3.1333	3.3417	3.55	3.7583	3.9667	4.175	4.3833	4.5917	4.8	5.0083	5.2167	5.425	5.6333	5.8417	6.05	6.2583	6.4667	6.675	6.8833	7.0917	7.3	7.5083	7.7167	7.925	8.1333	8.3417	8.55	8.7583	8.9667	9.175	9.3833	9.5917	9.8	10.0083	10.2167
0	0.20833	0.41667	0.625	0.83333	1.0417	1.25	1.4583	1.6667	1.875	2.0833	2.2917	2.5	2.7083	2.9167	3.125	3.3333	3.5417	3.75	3.9583	4.1667	4.375	4.5833	4.7917	5	5.2083	5.4167	5.625	5.8333	6.0417	6.25	6.4583	6.6667	6.875	7.0833	7.2917	7.5	7.7083	7.9167	8.125	8.3333	8.5417	8.75	8.9583	9.1667	9.375	9.5833	9.7917	10	10.2083
0	0.20833	0.41667	0.625	0.83333	1.0417	1.25	1.4583	1.6667	1.875	2.0833	2.2917	2.5	2.7083	2.9167	3.125	3.3333	3.5417	3.75	3.9583	4.1667	4.375	4.5833	4.7917	5	5.2083	5.4167	5.625	5.8333	6.0417	6.25	6.4583	6.6667	6.875	7.0833	7.2917	7.5	7.7083	7.9167	8.125	8.3333	8.5417	8.75	8.9583	9.1667	9.375	9.5833	9.7917	10	10.2083
0	0.20833	0.41667	0.625	0.83333	1.0417	1.25	1.4583	1.6667	1.875	2.0833	2.2917	2.5	2.7083	2.9167	3.125	3.3333	3.5417	3.75	3.9583	4.1667	4.375	4.5833	4.7917	5	5.2083	5.4167	5.625	5.8333	6.0417	6.25	6.4583	6.6667	6.875	7.0833	7.2917	7.5	7.7083	7.9167	8.125	8.3333	8.5417	8.75	8.9583	9.1667	9.375	9.5833	9.7917	10	10.2083
0	0.20833	0.41667	0.625	0.83333	1.0417	1.25	1.4583	1.6667	1.875	2.0833	2.2917	2.5	2.7083	2.9167	3.125	3.3333	3.5417	3.75	3.9583	4.1667	4.375	4.5833	4.7917	5	5.2083	5.4167	5.625	5.8333	6.0417	6.25	6.4583	6.6667	6.875	7.0833	7.2917	7.5	7.7083	7.9167	8.125	8.3333	8.5417	8.75	8.9583	9.1667	9.375	9.5833	9.7917	10	10.2083
0	0.20833	0.425	0.63333	0.84167	1.05	1.2583	1.4667	1.675	1.8833	2.0917	2.3	2.5083	2.7167	2.925	3.1333	3.3417	3.55	3.7583	3.9667	4.175	4.3833	4.5917	4.8	5.0083	5.2167	5.425	5.6333	5.8417	6.05	6.2583	6.4667	6.675	6.8833	7.0917	7.3	7.5083	7.7167	7.925	8.1333	8.3417	8.55	8.7583	8.9667	9.175	9.3833	9.5917	9.8	10.0083	10.2167
0	0.20833	0.425	0.63333	0.84167	1.05	1.2583	1.4667	1.675	1.8833	2.0917	2.3	2.5083	2.7167	2.925	3.1333	3.3417	3.55	3.7583	3.9667	4.175	4.3833	4.5917	4.8	5.0083	5.2167	5.425	5.6333	5.8417	6.05	6.2583	6.4667	6.675	6.8833	7.0917	7.3	7.5083	7.7167	7.925	8.1333	8.3417	8.55	8.7583	8.9667	9.175	9.3833	9.5917	9.8	10.0083	10.2167
0	0.20833	0.425	0.63333	0.84167	1.05	1.2583	1.4667	1.675	1.8833	2.0917	2.3	2.5083	2.7167	2.925	3.1333	3.3417	3.55	3.7583	3.9667	4.175	4.3833	4.5917	4.8	5.0083	5.2167	5.425	5.6333	5.8417	6.05	6.2583	6.4667	6.675	6.8833	7.0917	7.3	7.5083	7.7167	7.925	8.1333	8.3417	8.55	8.7583	8.9667	9.175	9.3833	9.5917	9.8	10.0083	10.2167
time
0	0.20833	0.41667	0.625	0.83333	1.0417	1.25	1.4583	1.6667	1.875	2.0833	2.2917	2.5	2.7083	2.9167	3.125	3.3333	3.5417	3.75	3.9583	4.1667	4.375	4.5833	4.7917	5	5.2083	5.4167	5.625	5.8333	6.0417	6.25	6.4583	6.6667	6.875	7.0833	7.2917	7.5	7.7083	7.9167	8.125	8.3333	8.5417	8.75	8.9583	9.1667	9.375	9.5833	9.7917	10	10.2083
0	0.20833	0.425	0.63333	0.84167	1.05	1.2583	1.4667	1.675	1.8833	2.0917	2.3	2.5083	2.7167	2.925	3.1333	3.3417	3.55	3.7583	3.9667	4.175	4.3833	4.5917	4.8	5.0083	5.2167	5.425	5.6333	5.8417	6.05	6.2583	6.4667	6.675	6.8833	7.0917	7.3	7.5083	7.7167	7.925	8.1333	8.3417	8.55	8.7583	8.9667	9.175	9.3833	9.5917	9.8	10.0083	10.2167
0	0.20833	0.41667	0.625	0.83333	1.0417	1.25	1.4583	1.6667	1.875	2.0833	2.2917	2.5	2.7083	2.9167	3.125	3.3333	3.5417	3.75	3.9583	4.1667	4.375	4.5833	4.7917	5	5.2083	5.4167	5.625	5.8333	6.0417	6.25	6.4583	6.6667	6.875	7.0833	7.2917	7.5	7.7083	7.9167	8.125	8.3333	8.5417	8.75	8.9583	9.1667	9.375	9.5833	9.7917	10	10.2083
0	0.20833	0.41667	0.625	0.83333	1.0417	1.25	1.4583	1.6667	1.875	2.0833	2.2917	2.5	2.7083	2.9167	3.125	3.3333	3.5417	3.75	3.9583	4.1667	4.375	4.5833	4.7917	5	5.2083	5.4167	5.625	5.8333	6.0417	6.25	6.4583	6.6667	6.875	7.0833	7.2917	7.5	7.7083	7.9167	8.125	8.3333	8.5417	8.75	8.9583	9.1667	9.375	9.5833	9.7917	10	10.2083
0	0.20833	0.41667	0.625	0.83333	1.0417	1.25	1.4583	1.6667	1.875	2.0833	2.2917	2.5	2.7083	2.9167	3.125	3.3333	3.5417	3.75	3.9583	4.1667	4.375	4.5833	4.7917	5	5.2083	5.4167	5.625	5.8333	6.0417	6.25	6.4583	6.6667	6.875	7.0833	7.2917	7.5	7.7083	7.9167	8.125	8.3333	8.5417	8.75	8.9583	9.1667	9.375	9.5833	9.7917	10	10.2083
0	0.20833	0.425	0.63333	0.84167	1.05	1.2583	1.4667	1.675	1.8833	2.0917	2.3	2.5083	2.7167	2.925	3.1333	3.3417	3.55	3.7583	3.9667	4.175	4.3833	4.5917	4.8	5.0083	5.2167	5.425	5.6333	5.8417	6.05	6.2583	6.4667	6.675	6.8833	7.0917	7.3	7.5083	7.7167	7.925	8.1333	8.3417	8.55	8.7583	8.9667	9.175	9.3833	9.5917	9.8	10.0083	10.2167
0	0.20833	0.425	0.63333	0.84167	1.05	1.2583	1.4667	1.675	1.8833	2.0917	2.3	2.5083	2.7167	2.925	3.1333	3.3417	3.55	3.7583	3.9667	4.175	4.3833	4.5917	4.8	5.0083	5.2167	5.425	5.6333	5.8417	6.05	6.2583	6.4667	6.675	6.8833	7.0917	7.3	7.5083	7.7167	7.925	8.1333	8.3417	8.55	8.7583	8.9667	9.175	9.3833	9.5917	9.8	10.0083	10.2167
0	0.20833	0.425	0.63333	0.84167	1.05	1.2583	1.4667	1.675	1.8833	2.0917	2.3	2.5083	2.7167	2.925	3.1333	3.3417	3.55	3.7583	3.9667	4.175	4.3833	4.5917	4.8	5.0083	5.2167	5.425	5.6333	5.8417	6.05	6.2583	6.4667	6.675	6.8833	7.0917	7.3	7.5083	7.7167	7.925	8.1333	8.3417	8.55	8.7583	8.9667	9.175	9.3833	9.5917	9.8	10.0083	10.2167
time
0	0.20833	0.41666	0.625	0.83333	1.0417	1.25	1.4583	1.6667	1.875	2.0833	2.2917	2.5	2.7083	2.9167	3.125	3.3333	3.5417	3.75	3.9583	4.1667	4.375	4.5833	4.7917	5	5.2083	5.4167	5.625	5.8333	6.0417	6.25	6.4583	6.6667	6.875	7.0833	7.2917	7.5	7.7083	7.9167	8.125	8.3333	8.5417	8.75	8.9583	9.1667	9.375	9.5833	9.7917	10	10.2083
0	0.20833	0.41666	0.625	0.83333	1.0417	1.25	1.4583	1.6667	1.875	2.0833	2.2917	2.5	2.7083	2.9167	3.125	3.3333	3.5417	3.75	3.9583	4.1667	4.375	4.5833	4.7917	5	5.2083	5.4167	5.625	5.8333	6.0417	6.25	6.4583	6.6667	6.875	7.0833	7.2917	7.5	7.7083	7.9167	8.125	8.3333	8.5417	8.75	8.9583	9.1667	9.375	9.5833	9.7917	10	10.2083
0	0.20833	0.41666	0.625	0.83333	1.0417	1.25	1.4583	1.6667	1.875	2.0833	2.2917	2.5	2.7083	2.9167	3.125	3.3333	3.5417	3.75	3.9583	4.1667	4.375	4.5833	4.7917	5	5.2083	5.4167	5.625	5.8333	6.0417	6.25	6.4583	6.6667	6.875	7.0833	7.2917	7.5	7.7083	7.9167	8.125	8.3333	8.5417	8.75	8.9583	9.1667	9.375	9.5833	9.7917	10	10.2083
0	0.20833	0.41666	0.625	0.83333	1.0417	1.25	1.4583	1.6667	1.875	2.0833	2.2917	2.5	2.7083	2.9167	3.125	3.3333	3.5417	3.75	3.9583	4.1667	4.375	4.5833	4.7917	5	5.2083	5.4167	5.625	5.8333	6.0417	6.25	6.4583	6.6667	6.875	7.0833	7.2917	7.5	7.7083	7.9167	8.125	8.3333	8.5417	8.75	8.9583	9.1667	9.375	9.5833	9.7917	10	10.2083
0	0.20833	0.41666	0.625	0.83333	1.0417	1.25	1.4583	1.6667	1.875	2.0833	2.2917	2.5	2.7083	2.9167	3.125	3.3333	3.5417	3.75	3.9583	4.1667	4.375	4.5833	4.7917	5	5.2083	5.4167	5.625	5.8333	6.0417	6.25	6.4583	6.6667	6.875	7.0833	7.2917	7.5	7.7083	7.9167	8.125	8.3333	8.5417	8.75	8.9583	9.1667	9.375	9.5833	9.7917	10	10.2083
0	0.20833	0.41666	0.625	0.83333	1.0417	1.25	1.4583	1.6667	1.875	2.0833	2.2917	2.5	2.7083	2.9167	3.125	3.3333	3.5417	3.75	3.9583	4.1667	4.375	4.5833	4.7917	5	5.2083	5.4167	5.625	5.8333	6.0417	6.25	6.4583	6.6667	6.875	7.0833	7.2917	7.5	7.7083	7.9167	8.125	8.3333	8.5417	8.75	8.9583	9.1667	9.375	9.5833	9.7917	10	10.2083
0	0.20833	0.41666	0.625	0.83333	1.0417	1.25	1.4583	1.6667	1.875	2.0833	2.2917	2.5	2.7083	2.9167	3.125	3.3333	3.5417	3.75	3.9583	4.1667	4.375	4.5833	4.7917	5	5.2083	5.4167	5.625	5.8333	6.0417	6.25	6.4583	6.6667	6.875	7.0833	7.2917	7.5	7.7083	7.9167	8.125	8.3333	8.5417	8.75	8.9583	9.1667	9.375	9.5833	9.7917	10	10.2083
0	0.20833	0.41666	0.625	0.83333	1.0417	1.25	1.4583	1.6667	1.875	2.0833	2.2917	2.5	2.7083	2.9167	3.125	3.3333	3.5417	3.75	3.9583	4.1667	4.375	4.5833	4.7917	5	5.2083	5.4167	5.625	5.8333	6.0417	6.25	6.4583	6.6667	6.875	7.0833	7.2917	7.5	7.7083	7.9167	8.125	8.3333	8.5417	8.75	8.9583	9.1667	9.375	9.5833	9.7917	10	10.2083
OD lower right panel
0.10393	0.12202	0.14109	0.15606	0.1789	0.21202	0.24732	0.27303	0.30684	0.32974	0.37201	0.41152	0.46199	0.50487	0.564	0.62796	0.68079	0.74497	0.80333	0.82013	0.84001	0.85615	0.8677	0.88091	0.90187	0.92133	0.93199	0.93871	0.96915	0.96607	0.97322	0.98645	0.99257	0.9838	0.99103	0.98906	0.99073	0.99747	0.99322	0.98679	1.0041	0.99105	0.99979	1.0019	0.99594	0.99091	0.99539	0.99378	0.9826	1.0024
0.61594	0.73232	0.80326	0.8756	0.93671	0.96876	0.97772	0.98391	0.98918	0.99412	1.0031	0.9976	0.98479	0.9937	1.0015	0.99344	0.98323	0.98415	0.98211	0.98528	0.98622	0.99136	0.99164	0.98258	0.9806	0.98263	0.98373	0.98805	0.99945	1.0001	0.99491	0.99267	0.99607	0.9955	0.99686	1.0088	0.99893	1.0061	0.99707	0.99992	1.003	1.0044	1.0006	1.0077	1.0083	1.0036	1.0196	1.0209	1.0269	1.029
0.084001	0.10354	0.11609	0.13434	0.15846	0.19026	0.22943	0.26286	0.29714	0.32849	0.38456	0.41496	0.46242	0.52082	0.57241	0.65096	0.72057	0.79078	0.85694	0.88366	0.9087	0.92412	0.93974	0.96266	0.97931	1.0127	1.0317	1.0508	1.075	1.0702	1.0786	1.0815	1.0932	1.0907	1.0894	1.0962	1.0986	1.0975	1.0993	1.1031	1.1091	1.1001	1.1025	1.1057	1.1037	1.1028	1.1002	1.0993	1.0973	1.1108
0.12043	0.14041	0.15673	0.17702	0.19925	0.23408	0.26891	0.29319	0.32689	0.3573	0.39347	0.4371	0.49032	0.53936	0.59399	0.64833	0.69793	0.75049	0.79424	0.79905	0.81034	0.82271	0.83358	0.83502	0.84187	0.86097	0.8734	0.8764	0.88408	0.88096	0.88987	0.89131	0.89717	0.89334	0.89258	0.89682	0.89794	0.89452	0.89334	0.89613	0.90023	0.89577	0.89596	0.89422	0.89241	0.89391	0.89102	0.88803	0.88739	0.89172
0.10736	0.13175	0.14482	0.15916	0.17869	0.20529	0.23676	0.2617	0.28429	0.31169	0.34003	0.37505	0.41881	0.46327	0.51743	0.57259	0.63017	0.6915	0.7459	0.78112	0.79819	0.8172	0.83259	0.85179	0.86607	0.88407	0.90223	0.9227	0.94804	0.95122	0.95781	0.96923	0.97714	0.98237	0.98302	0.9857	0.98752	0.98933	0.99018	0.99114	0.99022	0.99135	0.99227	0.99023	0.99038	0.99034	0.9913	0.99194	0.99218	0.99347
0.63987	0.77927	0.87942	0.97971	1.0598	1.1096	1.1222	1.1265	1.149	1.1465	1.1433	1.1531	1.1196	1.1358	1.1455	1.1355	1.1341	1.126	1.123	1.1213	1.1278	1.1266	1.1283	1.1352	1.1277	1.1089	1.1179	1.1206	1.1313	1.1307	1.1364	1.1252	1.1212	1.1231	1.1273	1.1348	1.1316	1.1228	1.1282	1.1284	1.13	1.1361	1.1327	1.1392	1.1391	1.1402	1.1455	1.1326	1.147	1.1365
0.58749	0.66734	0.73754	0.79821	0.83753	0.85184	0.85531	0.85577	0.85396	0.85197	0.85581	0.86375	0.85137	0.84875	0.84518	0.84158	0.84013	0.84024	0.83817	0.8347	0.84779	0.84585	0.84376	0.84262	0.83559	0.8332	0.84128	0.84846	0.85307	0.85667	0.86195	0.8505	0.85318	0.86256	0.86709	0.87184	0.87023	0.87198	0.87655	0.87688	0.87762	0.87766	0.87082	0.87621	0.87619	0.88518	0.89044	0.89495	0.91706	0.91704
0.62045	0.69863	0.78227	0.86143	0.92551	0.94687	0.96247	0.96777	0.9758	0.97922	0.98312	0.98557	0.98958	0.98987	0.99109	0.99203	0.99263	0.98977	0.9895	0.98766	0.99389	0.99255	0.99707	0.99677	0.99344	0.99529	0.9999	1.0009	0.99993	1.0035	1.0047	1.0029	1.0007	1.0015	1.0054	1.0078	1.008	1.0092	1.0069	1.0062	1.0054	1.0041	1.0007	1.0033	1.0097	1.009	1.0065	1.0219	1.0354	1.0326
OD lower left panel
0.62321	0.70542	0.81721	0.90495	0.97113	1.0127	1.0602	1.0799	1.0294	1.0292	1.0477	1.0303	1.0158	0.99248	0.97704	0.97607	0.92559	0.85751	0.8417	0.7879	0.74219	0.71194	0.70059	0.65496	0.60601	0.5879	0.54125	0.50009	0.42501	0.39016	0.36847	0.33324	0.3082	0.29135	0.26014	0.25631	0.25637	0.23557	0.22036	0.22811	0.20015	0.20646	0.19716	0.1843	0.1977	0.19101	0.18523	0.19802	0.22266	0.21765
0.093833	0.12436	0.13941	0.16991	0.17874	0.20286	0.23647	0.24211	0.24003	0.26606	0.25722	0.26649	0.29002	0.28996	0.32083	0.36183	0.37303	0.40921	0.4756	0.51302	0.58096	0.65979	0.71454	0.77912	0.84132	0.89648	0.96617	0.97868	0.99495	1.0036	1.0111	0.98353	0.99122	0.96823	0.95985	0.95493	0.97802	0.94997	0.94039	0.93715	0.943	0.93799	0.94807	0.91865	0.92088	0.93853	0.93939	0.92774	0.92769	0.93588
0.14583	0.13669	0.15405	0.16862	0.18729	0.21626	0.23565	0.2596	0.27175	0.27857	0.29039	0.29961	0.31663	0.33864	0.36473	0.40001	0.43224	0.48276	0.5309	0.58394	0.64373	0.71194	0.77309	0.8344	0.89123	0.954	0.99922	1.0289	1.0055	1.006	1.005	0.98964	0.99497	0.97377	0.95975	0.95924	0.95467	0.945	0.94114	0.94453	0.94529	0.93102	0.9401	0.92261	0.92415	0.92169	0.92514	0.92311	0.92417	0.92387
0.075927	0.083531	0.096505	0.111	0.13426	0.15433	0.17671	0.19054	0.18968	0.18667	0.18852	0.18982	0.19509	0.20812	0.22228	0.24499	0.26506	0.29462	0.33792	0.38594	0.44704	0.51321	0.58542	0.65216	0.73314	0.81763	0.88179	0.92795	0.98829	0.99782	1.0036	0.99896	1.0007	0.97081	0.96568	0.96861	0.95093	0.93252	0.9371	0.93664	0.93585	0.93991	0.93792	0.92924	0.92987	0.92965	0.92784	0.92414	0.92529	0.92673
0.059738	0.13768	0.18047	0.18961	0.21724	0.24089	0.26639	0.29169	0.26114	0.28675	0.2927	0.31578	0.32748	0.3411	0.3467	0.40005	0.4136	0.45835	0.51253	0.58492	0.64787	0.71663	0.77366	0.82816	0.86443	0.94271	1.0279	1.0118	0.97268	1.0029	1.0025	0.95445	0.96928	0.95225	0.94093	0.9432	0.97087	0.93801	0.95011	0.94233	0.93478	0.93751	0.95581	0.91281	0.93275	0.95908	0.96307	0.95086	0.92402	0.94747
0.65681	0.75701	0.85078	0.94606	1.0142	1.0593	1.0957	1.0902	1.0944	1.0977	1.0698	1.0375	1.0179	1.0107	1.0241	1.0279	0.9966	0.97549	0.92545	0.89633	0.87847	0.84175	0.80107	0.75149	0.69772	0.65606	0.61057	0.57966	0.55189	0.51776	0.48013	0.44473	0.40811	0.38747	0.36348	0.33552	0.31698	0.28394	0.26955	0.2688	0.25493	0.24871	0.23264	0.21965	0.21909	0.21186	0.20778	0.2133	0.21261	0.216
0.57709	0.6716	0.80588	0.85374	0.97109	1.0043	1.0963	1.1441	0.99229	0.95292	1.0344	1.081	1.0896	1.0439	0.98442	0.96781	0.94774	0.81165	0.79872	0.72182	0.68132	0.60543	0.70766	0.66419	0.61865	0.54478	0.49638	0.4255	0.37483	0.31319	0.29396	0.28475	0.2589	0.23562	0.21733	0.21777	0.19298	0.19635	0.1593	0.15118	0.14775	0.14624	0.12019	0.13755	0.13137	0.12923	0.13498	0.1358	0.14648	0.15818
0.63573	0.74561	0.84062	0.89305	0.93048	0.96342	0.99017	1.0195	0.99768	0.99626	0.97942	0.95391	0.94713	0.92513	0.90311	0.87208	0.81683	0.80199	0.75557	0.70808	0.67665	0.62838	0.57966	0.54109	0.49446	0.54317	0.50187	0.44247	0.34423	0.3154	0.29385	0.26046	0.24557	0.23158	0.20645	0.20235	0.21428	0.22314	0.2136	0.20867	0.19977	0.20127	0.20465	0.20847	0.20974	0.21568	0.22692	0.24558	0.26097	0.28312
OD upper right panel
0.090587	0.10311	0.11868	0.13387	0.14744	0.1651	0.18449	0.1892	0.1867	0.18581	0.17885	0.17563	0.1843	0.18926	0.19777	0.21552	0.23505	0.26355	0.29865	0.3343	0.38022	0.43223	0.48659	0.54765	0.61228	0.67384	0.71052	0.7466	0.76722	0.79017	0.80819	0.83108	0.84448	0.86765	0.8836	0.89241	0.89472	0.9006	0.9072	0.9021	0.90525	0.90778	0.90938	0.90628	0.91328	0.91174	0.91759	0.91464	0.91933	0.92192
0.55307	0.6135	0.69277	0.78018	0.83156	0.85932	0.8772	0.87229	0.8893	0.89926	0.88535	0.90041	0.89394	0.89744	0.89763	0.88334	0.89412	0.88428	0.88805	0.90011	0.89824	0.89651	0.89877	0.90567	0.90556	0.8907	0.90532	0.90559	0.90835	0.91463	0.91391	0.91723	0.91387	0.90877	0.91685	0.91605	0.92173	0.9322	0.93048	0.92934	0.92738	0.93278	0.94167	0.94943	0.9115	0.92112	0.9168	0.9184	0.91444	0.91157
0.065877	0.071312	0.085247	0.098164	0.11413	0.12489	0.1498	0.14218	0.1332	0.12767	0.12154	0.12249	0.12634	0.13147	0.14476	0.15992	0.18112	0.20671	0.2393	0.27908	0.32276	0.37651	0.43229	0.49352	0.55916	0.62292	0.66169	0.6841	0.71283	0.73607	0.75488	0.77416	0.79503	0.81662	0.83552	0.85042	0.85022	0.85473	0.85858	0.85973	0.86132	0.86398	0.86517	0.86837	0.86962	0.87402	0.87609	0.87975	0.88236	0.88295
0.11538	0.12921	0.14345	0.15865	0.17754	0.19516	0.20946	0.22867	0.22653	0.22118	0.21725	0.21584	0.22221	0.23292	0.24939	0.27063	0.2978	0.33025	0.36832	0.41663	0.46845	0.53064	0.59528	0.66132	0.72858	0.79085	0.80992	0.83194	0.8581	0.87584	0.89132	0.91556	0.93091	0.95387	0.96583	0.98426	0.9853	0.98989	0.99017	0.97739	0.97451	0.98385	0.97864	0.98031	0.99526	0.99646	0.98937	0.98843	0.99556	0.99191
0.090503	0.11367	0.12444	0.13965	0.15479	0.17181	0.18619	0.20501	0.20304	0.20068	0.19582	0.19021	0.1963	0.20143	0.20378	0.21526	0.23042	0.25037	0.27947	0.30799	0.34661	0.39071	0.43941	0.48743	0.55123	0.60981	0.66856	0.71871	0.73451	0.7535	0.77624	0.79504	0.81061	0.82657	0.84011	0.83688	0.84965	0.85821	0.86873	0.87381	0.87458	0.87632	0.87576	0.86825	0.87801	0.87812	0.87961	0.88207	0.88382	0.88288
0.59051	0.61511	0.69537	0.77329	0.83467	0.86037	0.87209	0.87054	0.8738	0.86897	0.87224	0.87691	0.86146	0.86029	0.87387	0.87355	0.87327	0.87484	0.87218	0.87635	0.87833	0.87384	0.87789	0.88026	0.88072	0.87081	0.87467	0.88262	0.87597	0.89112	0.89031	0.90267	0.89808	0.89682	0.90317	0.9089	0.91306	0.91706	0.9206	0.91839	0.9198	0.91479	0.91142	0.90572	0.8786	0.85353	0.86202	0.864	0.87027	0.87005
0.53941	0.63161	0.70648	0.77757	0.85501	0.89886	0.90689	0.91912	0.92286	0.91828	0.92939	0.93285	0.94049	0.94683	0.93593	0.92564	0.91581	0.93093	0.93262	0.92879	0.92777	0.95199	0.94093	0.95431	0.95204	0.94166	0.96501	0.96861	0.96702	0.96634	0.96546	0.95051	0.94685	0.93845	0.93551	0.93051	0.93376	0.92576	0.94178	0.95351	0.97849	0.99409	0.99327	0.99087	0.98995	0.99137	0.98558	0.98174	0.97849	0.97185
0.52927	0.59809	0.69049	0.75154	0.81154	0.85179	0.86321	0.87176	0.87589	0.87937	0.8794	0.88028	0.87769	0.87641	0.87799	0.87466	0.87197	0.87069	0.87011	0.87375	0.87097	0.87168	0.87134	0.87125	0.87171	0.87238	0.87378	0.87402	0.87415	0.87661	0.87477	0.87395	0.88304	0.88929	0.8965	0.91453	0.91815	0.91806	0.92063	0.91565	0.91229	0.90946	0.90653	0.90832	0.91027	0.90832	0.90674	0.90356	0.89957	0.89675
OD upper left panel
0.59686	0.64867	0.70711	0.78848	0.84346	0.89608	0.91325	0.87775	0.83003	0.7727	0.70506	0.64484	0.6112	0.53535	0.47129	0.43125	0.3822	0.34158	0.30377	0.26877	0.23979	0.21378	0.19222	0.17241	0.15499	0.14096	0.13201	0.12343	0.117	0.11053	0.10642	0.10093	0.098992	0.10032	0.098367	0.098014	0.10015	0.10164	0.10579	0.11044	0.11641	0.12498	0.13259	0.14265	0.1557	0.16661	0.1799	0.19742	0.21552	0.23395
0.12819	0.14182	0.15729	0.17756	0.19953	0.20599	0.18966	0.16629	0.14192	0.12033	0.10239	0.090779	0.080592	0.071526	0.06794	0.067712	0.068215	0.074109	0.082241	0.093964	0.10831	0.12894	0.15255	0.18007	0.21865	0.25839	0.30967	0.3649	0.42648	0.49548	0.57015	0.64483	0.71774	0.78166	0.83737	0.87159	0.89176	0.89134	0.89203	0.88308	0.8925	0.87951	0.87327	0.87759	0.86263	0.85515	0.86199	0.84836	0.85177	0.8552
0.55807	0.6208	0.67362	0.74357	0.79271	0.84077	0.80604	0.74547	0.69301	0.63608	0.55076	0.47343	0.41842	0.3537	0.31431	0.26906	0.22821	0.1922	0.16004	0.13378	0.11135	0.093256	0.079871	0.069314	0.071145	0.061857	0.063136	0.063027	0.063034	0.06535	0.066322	0.067039	0.067359	0.070647	0.074295	0.075097	0.078575	0.08208	0.086522	0.093418	0.099333	0.10737	0.11409	0.12491	0.13556	0.14503	0.15737	0.1691	0.1848	0.20048
0.6655	0.707	0.77717	0.8571	0.92709	0.99395	0.96853	0.96712	0.90178	0.8319	0.76753	0.74734	0.65586	0.58351	0.50992	0.4608	0.40456	0.35536	0.31231	0.27563	0.24424	0.21858	0.19752	0.1771	0.16174	0.14837	0.13674	0.1274	0.11919	0.11204	0.10775	0.10376	0.10056	0.097794	0.095952	0.09465	0.094415	0.095011	0.096159	0.097929	0.10081	0.1053	0.11033	0.11672	0.12372	0.13249	0.14342	0.1559	0.16954	0.18548
0.56701	0.62644	0.69336	0.75032	0.80241	0.86151	0.89854	0.86534	0.85692	0.83705	0.82794	0.77088	0.69768	0.65743	0.59159	0.54817	0.52061	0.47584	0.43409	0.39791	0.36035	0.32554	0.29446	0.26425	0.23902	0.2151	0.19529	0.17762	0.16436	0.1523	0.14378	0.13611	0.13042	0.12698	0.12516	0.12445	0.12597	0.12899	0.13373	0.13906	0.14793	0.15908	0.17244	0.18775	0.20426	0.22173	0.24199	0.26774	0.29154	0.31467
0.081961	0.1025	0.11245	0.13087	0.15313	0.15131	0.1357	0.11364	0.086406	0.067973	0.052692	0.042561	0.032745	0.02439	0.020226	0.018779	0.019142	0.024424	0.030384	0.040384	0.051497	0.069566	0.091766	0.11479	0.15035	0.18814	0.23156	0.28801	0.34964	0.41961	0.49191	0.57109	0.64533	0.71171	0.76801	0.81139	0.84009	0.83202	0.83512	0.82575	0.8256	0.82086	0.81737	0.81099	0.79973	0.79697	0.78911	0.78314	0.78605	0.78754
0.15097	0.16054	0.17478	0.19746	0.21309	0.22671	0.21093	0.18856	0.16359	0.14252	0.12504	0.11017	0.098953	0.090414	0.086452	0.085694	0.088311	0.093349	0.10175	0.11413	0.12998	0.15053	0.17525	0.20553	0.24246	0.28649	0.33753	0.39658	0.46475	0.53705	0.61619	0.69817	0.77423	0.84186	0.89871	0.94267	0.96032	0.9568	0.95982	0.96069	0.95662	0.95193	0.94784	0.94216	0.93823	0.93525	0.9294	0.92872	0.92761	0.92585
0.15165	0.16696	0.17845	0.19999	0.22786	0.23269	0.22134	0.19993	0.17422	0.15146	0.13357	0.11921	0.10892	0.10108	0.096893	0.096383	0.098289	0.10372	0.11274	0.12565	0.14182	0.16404	0.1907	0.22124	0.25926	0.3031	0.35403	0.40989	0.46781	0.53013	0.597	0.66761	0.72315	0.77857	0.84449	0.86528	0.8809	0.87973	0.88234	0.88042	0.87502	0.87007	0.86608	0.86284	0.85804	0.85577	0.85259	0.84897	0.84856	0.84285
[truncated: 46 more columns]
