# Supplementary material for: Delayed antibiotic exposure induces population collapse in enterococcal communities with drug-resistant subpopulations
Source: eLife journal article supplement (doi:10.7554/elife.52813), 2020-03-23
Supplement: supp [file elife-52813-supp-v1.zip › elife_poa_e52813_Figure_5_source_data_1.xlsx]

## Sheet: Sheet1
Final Cell Density (lower right panel)
Rep 1	Rep 2	Rep 3	Mean		Start Time
0.00831349	0.122775	0.060398	0.0638289		0
0.0644074	0.061559	0.138641	0.0882024		0.5
0.0857114	0.0417695	0.08464	0.070707		1
0.114314	0.2236	0.0928008	0.143571		1.5
0.219391	0.358654	0.405495	0.327846		2
0.253082	0.506889	NaN	0.379986		2.5
Final Cell Density (lower left panel)
Rep 1	Rep 2	Rep 3	Mean		Start Time
0.98009	1.11706	0.982296	1.02648		0
0.763803	0.635808	0.723657	0.707756		0.5
0.487686	0.505198	0.44526	0.479381		1
0.50088	0.406319	0.61522	0.507473		1.5
0.407084	0.477153	0.398466	0.427568		2
0.216916	0.39273	0.346352	0.318666		2.5
