# Supplementary figures and images for: Delayed antibiotic exposure induces population collapse in enterococcal communities with drug-resistant subpopulations
Source: eLife journal article supplement (doi:10.7554/elife.52813), 2020-03-23

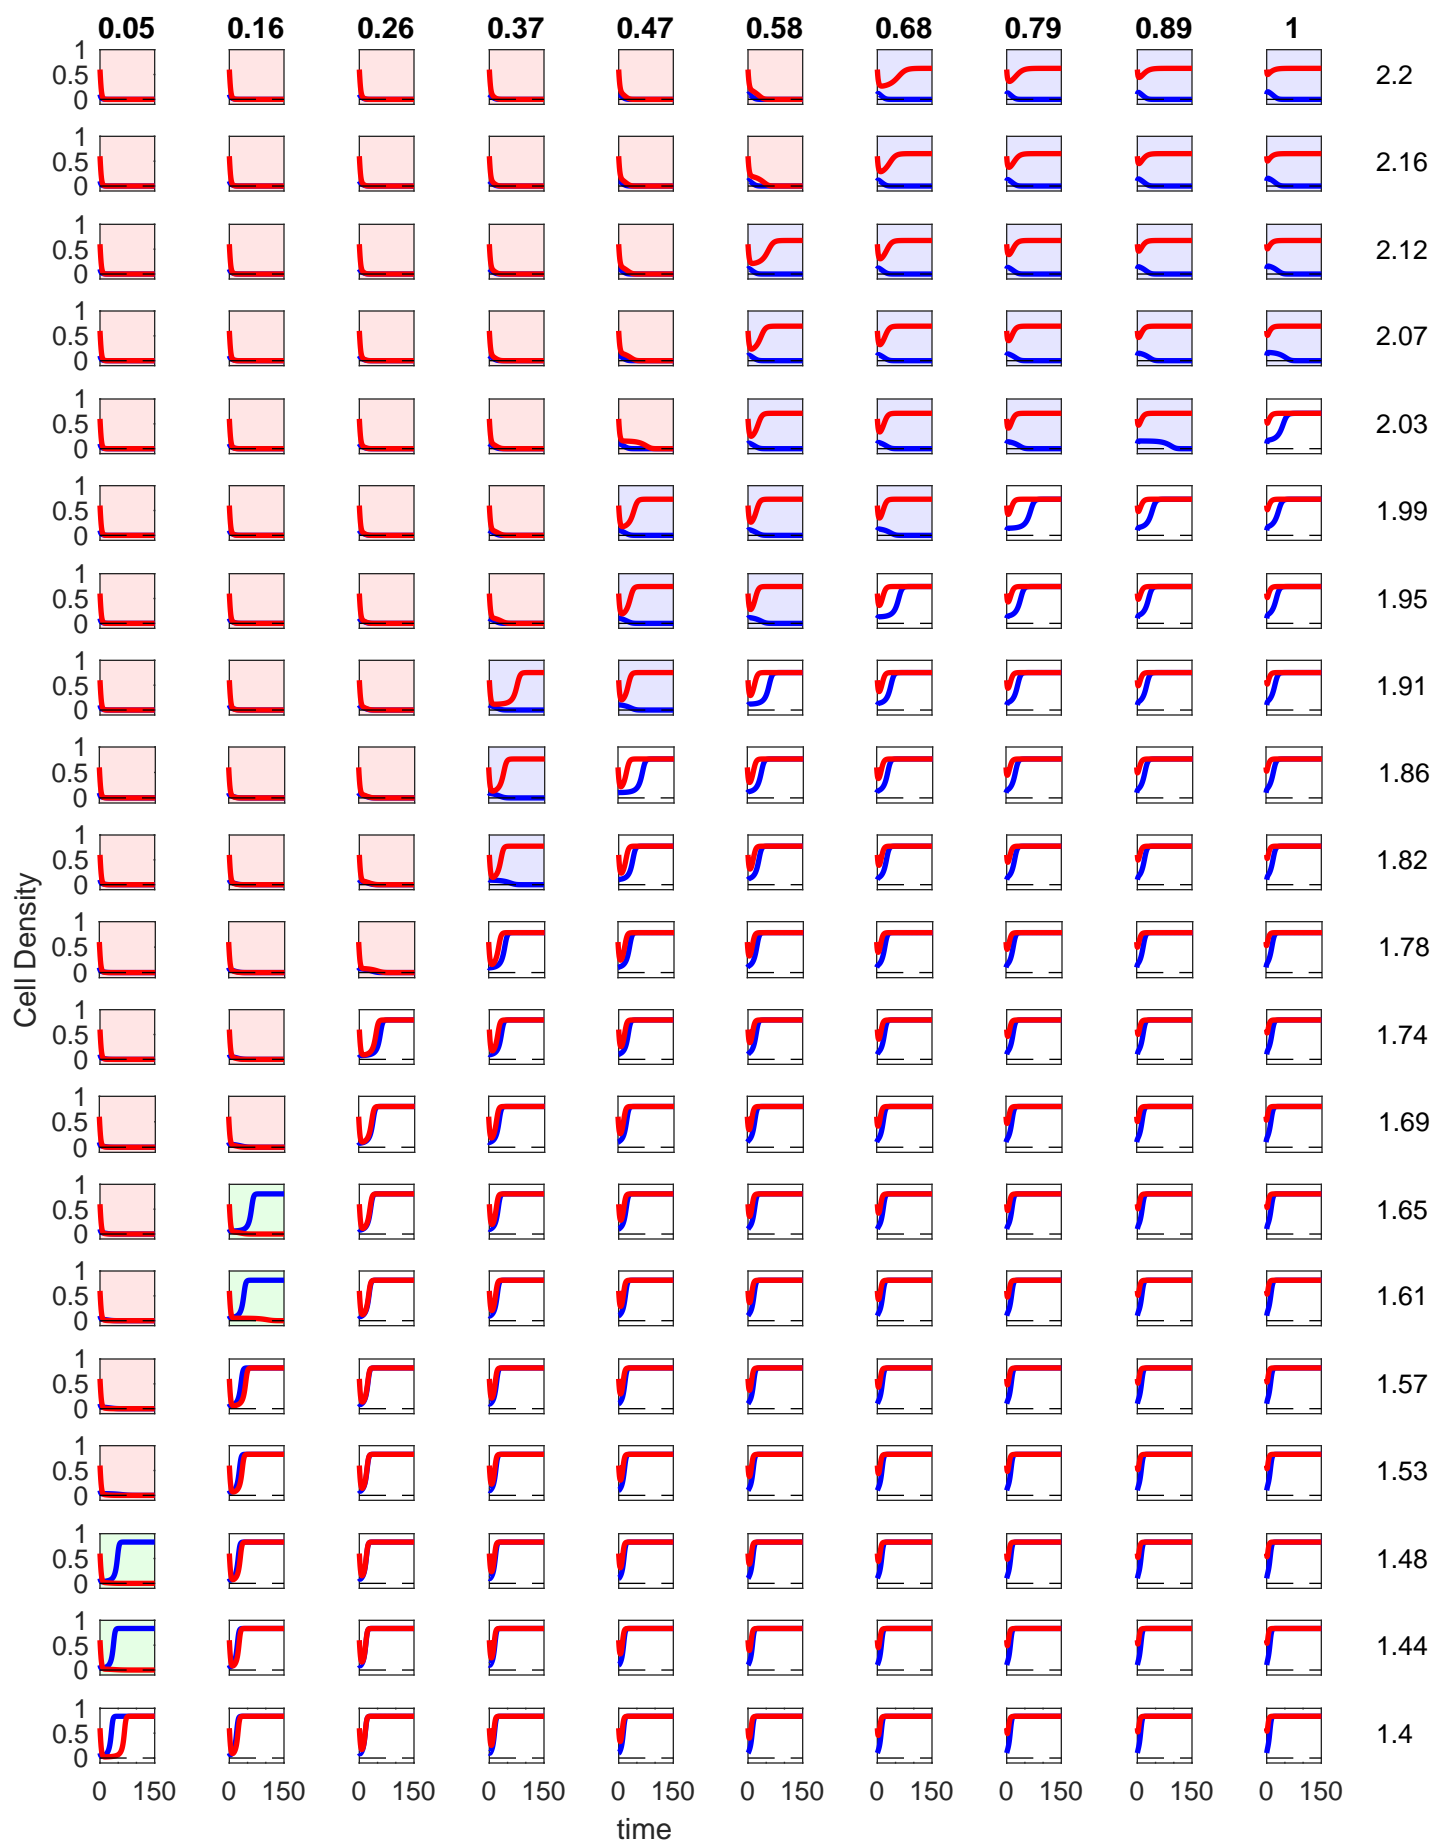

Supplement: supp [file elife-52813-supp-v1.zip › elife_poa_e52813_Figure_3_figure_supplement_4.pdf]

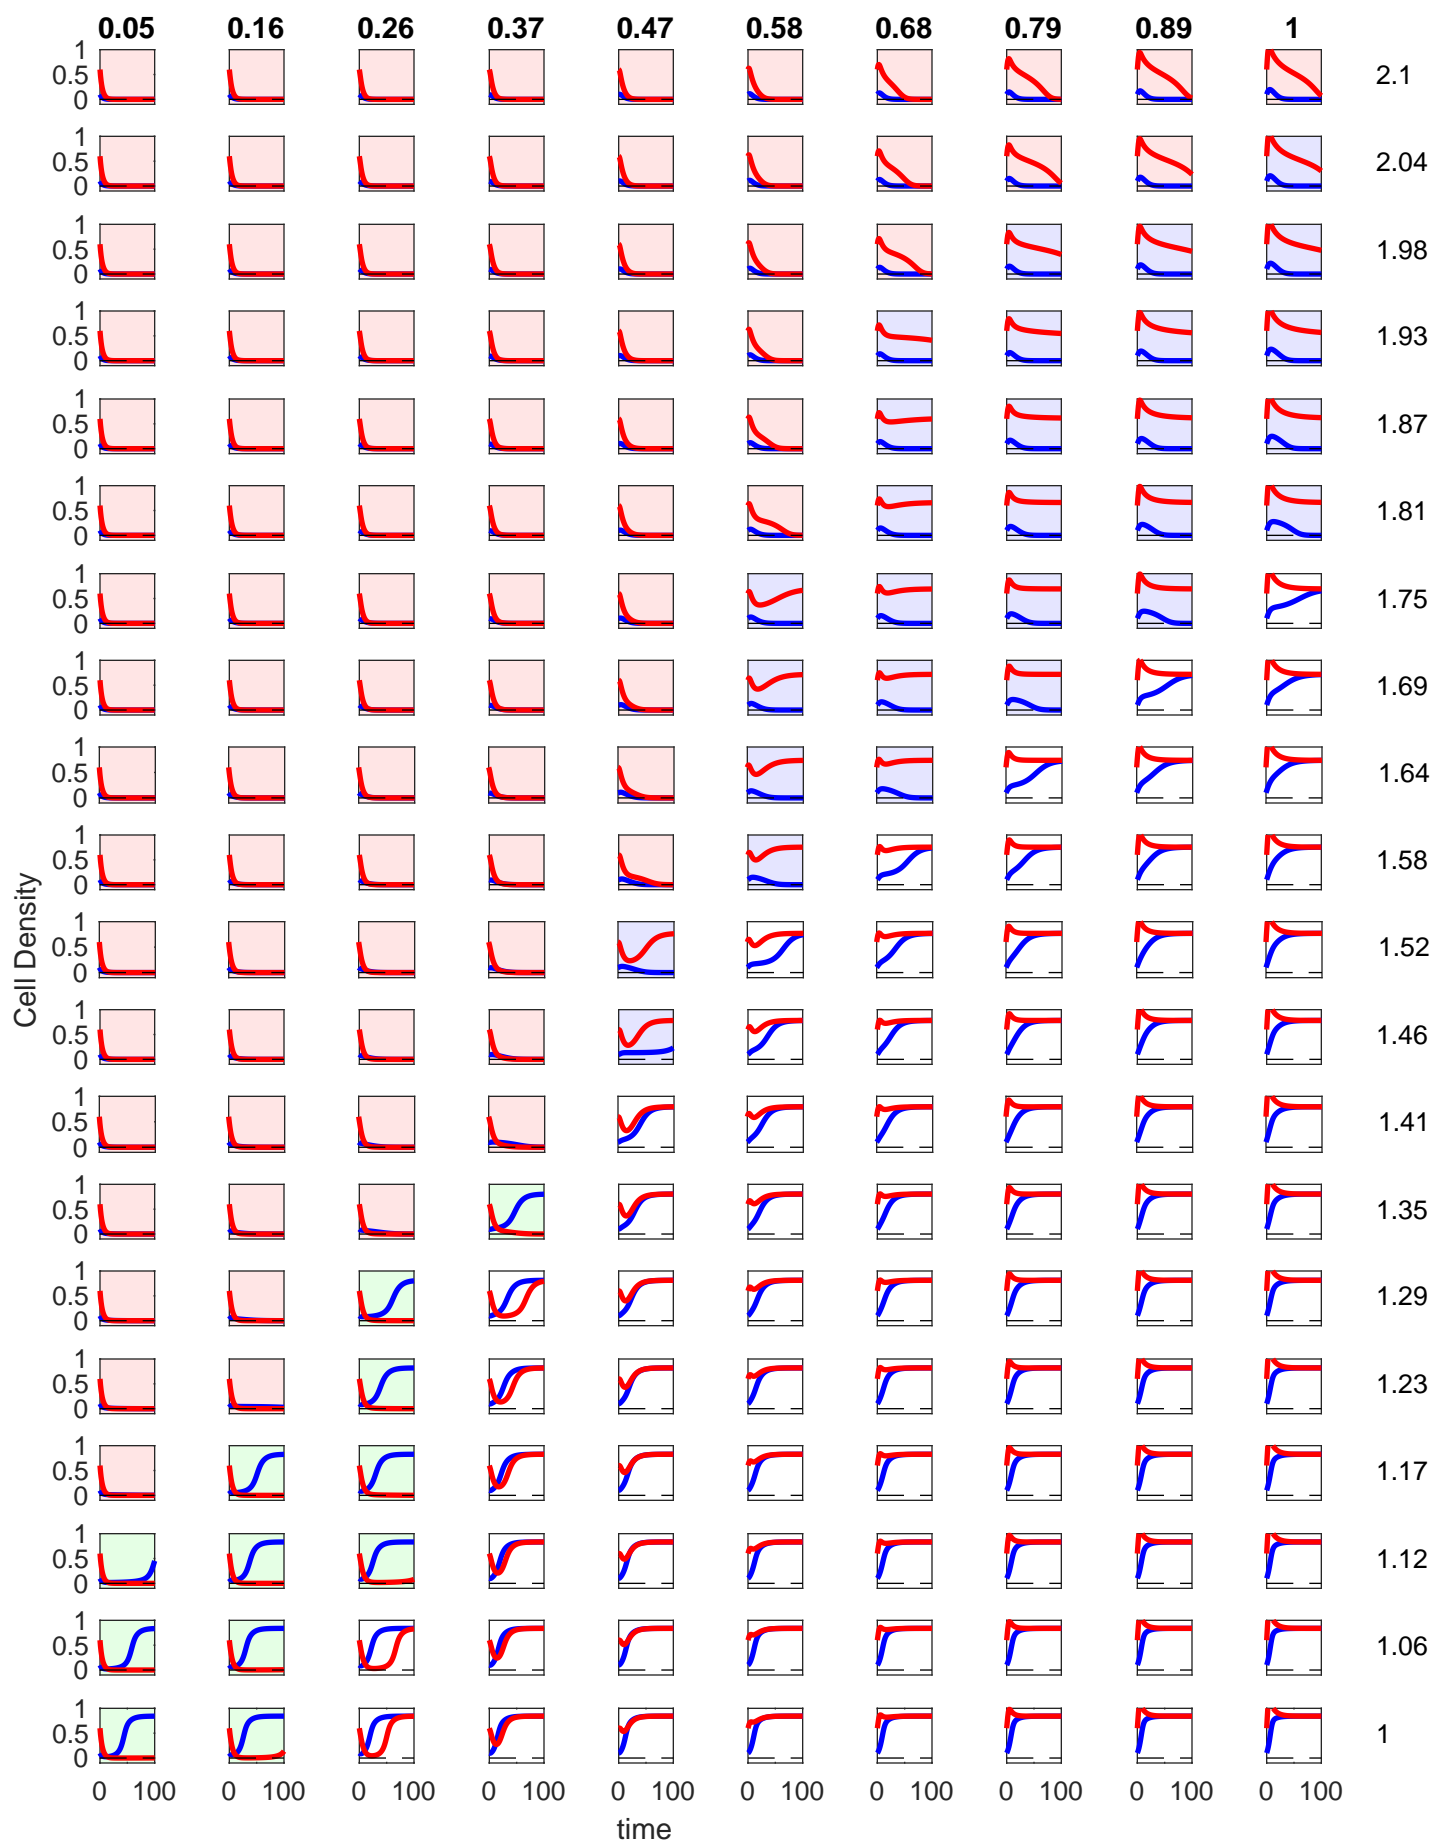

Supplement: supp [file elife-52813-supp-v1.zip › elife_poa_e52813_Figure_3_figure_supplement_5.pdf]

Original Model

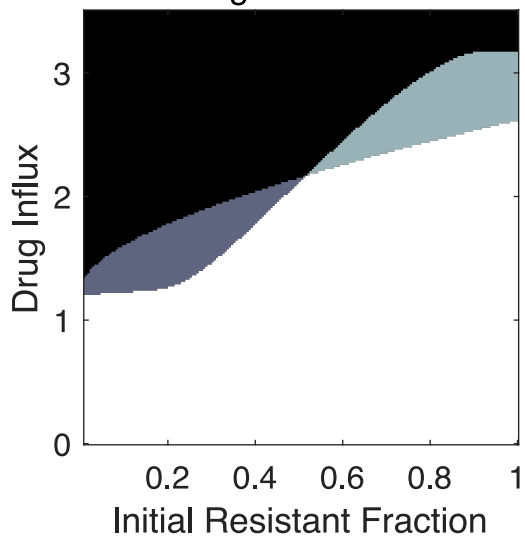

Enzyme-Release Model

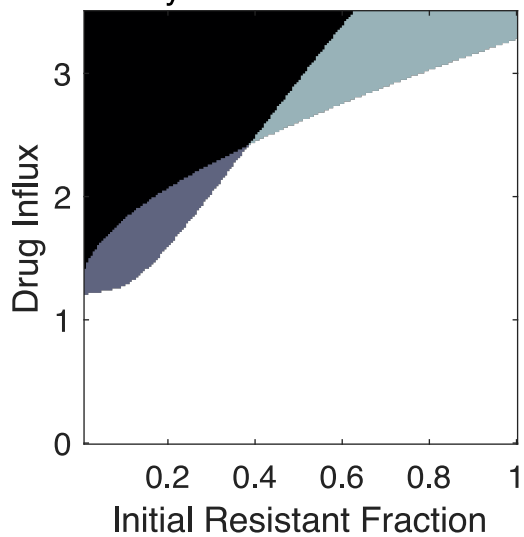

pH-IC50 Model

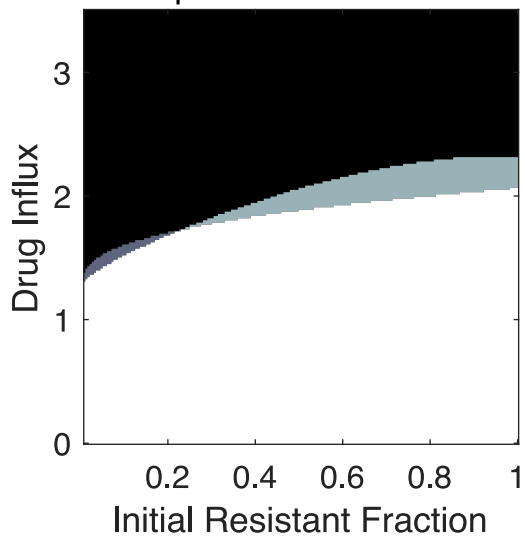

Monod Model

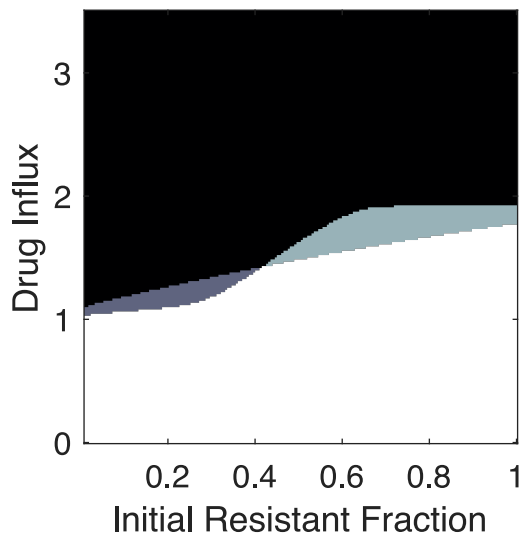

Supplement: supp [file elife-52813-supp-v1.zip › elife_poa_e52813_Figure_3_figure_supplement_1.pdf]

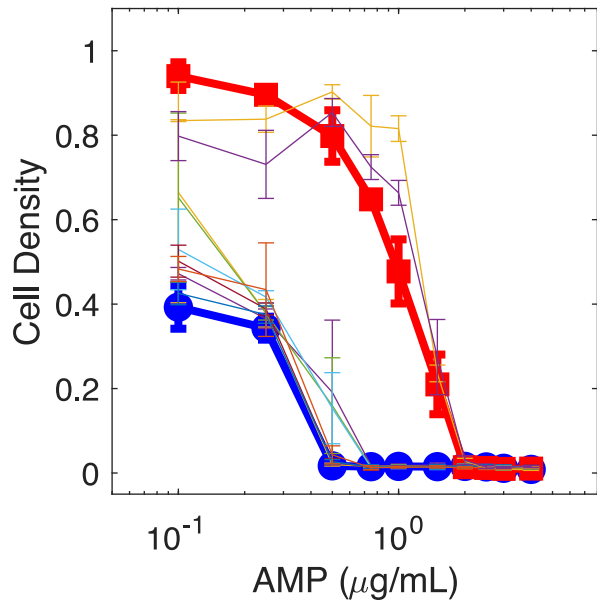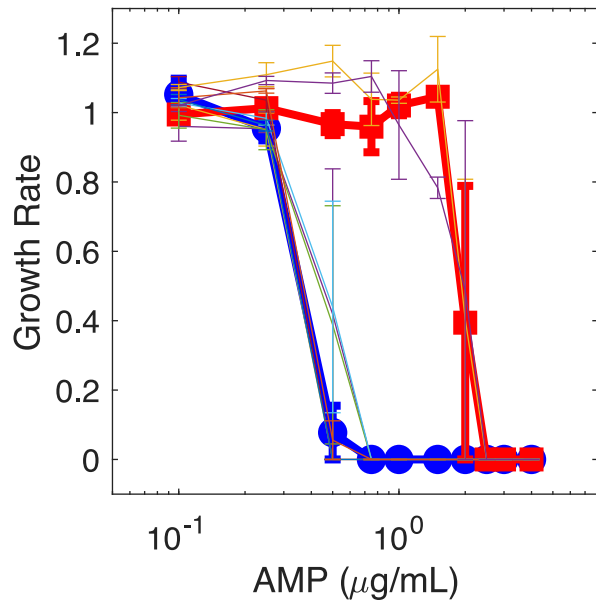

Supplement: supp [file elife-52813-supp-v1.zip › elife_poa_e52813_Figure_3_figure_supplement_7.pdf]

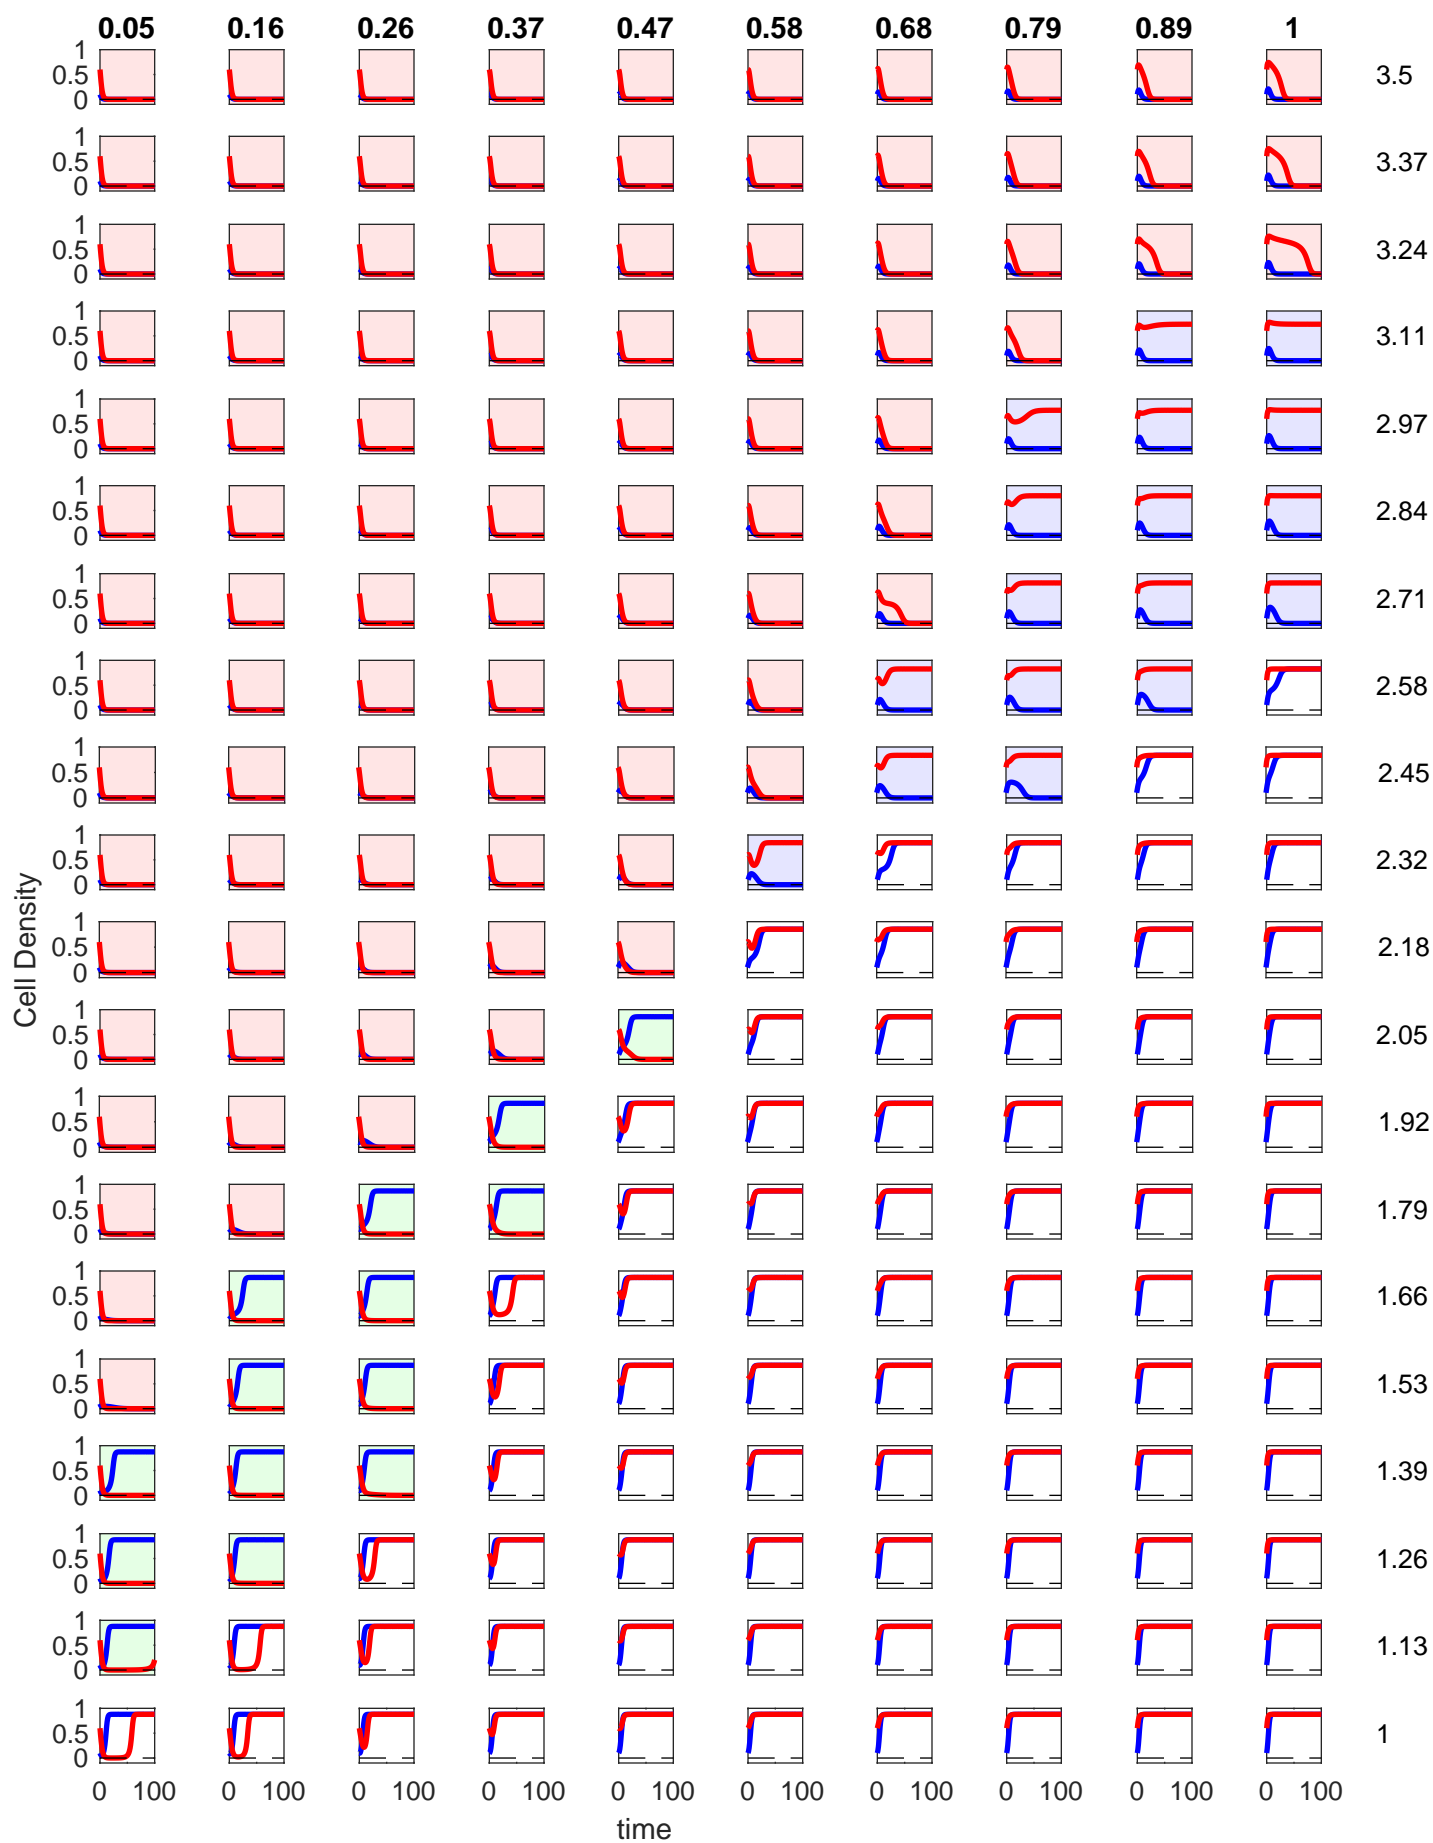

Supplement: supp [file elife-52813-supp-v1.zip › elife_poa_e52813_Figure_3_figure_supplement_2.pdf]

**Inverted Bistable Regime**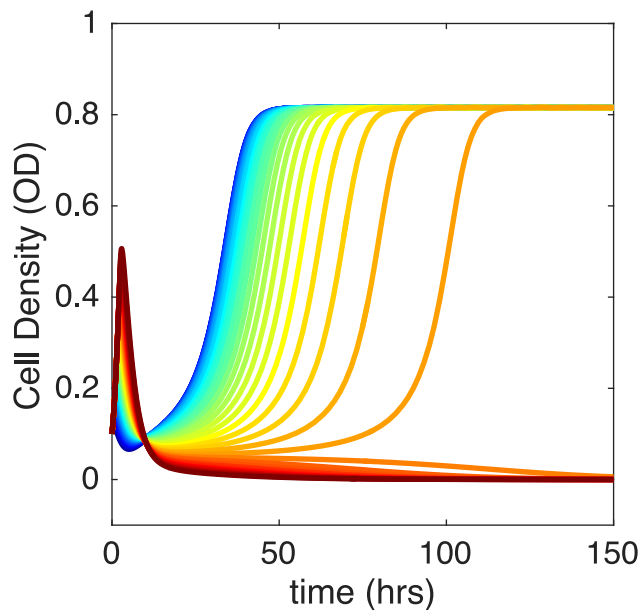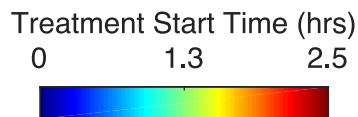**Bistable Regime**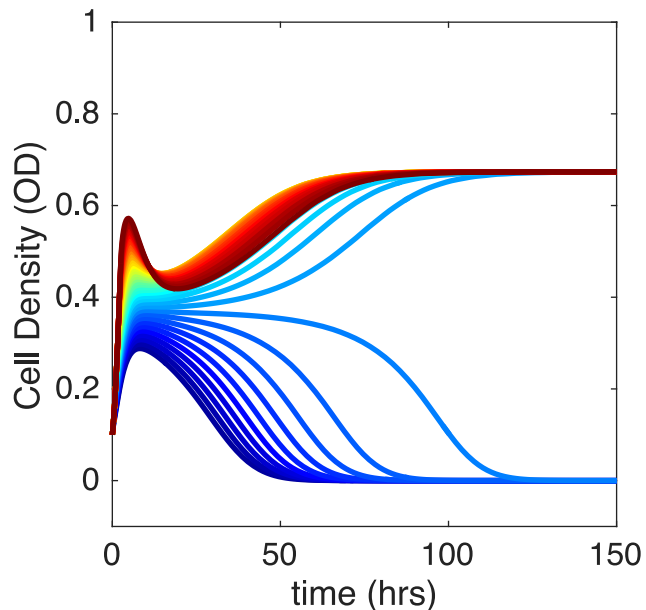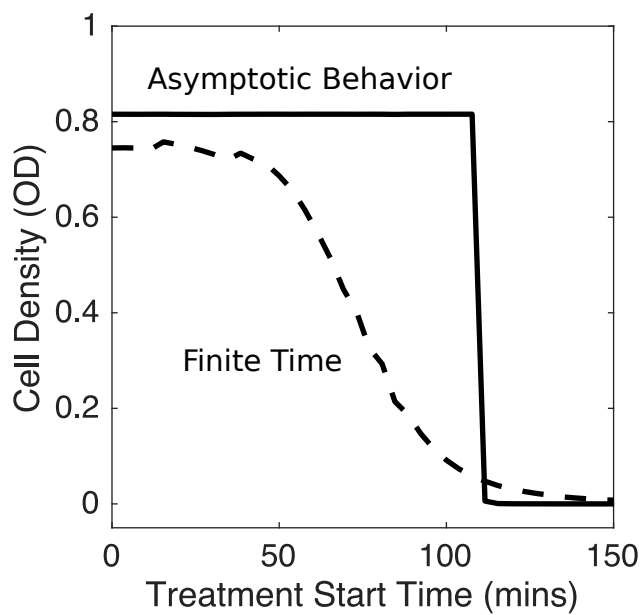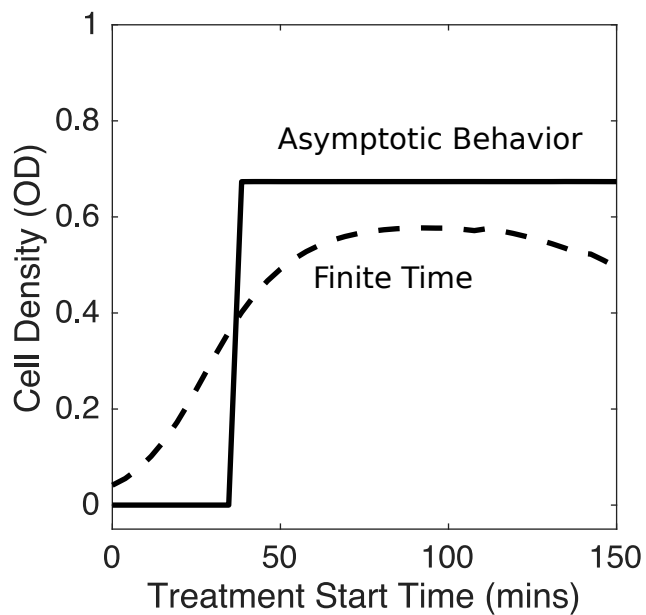

Supplement: supp [file elife-52813-supp-v1.zip › elife_poa_e52813_Figure_5_figure_supplement_1.pdf]

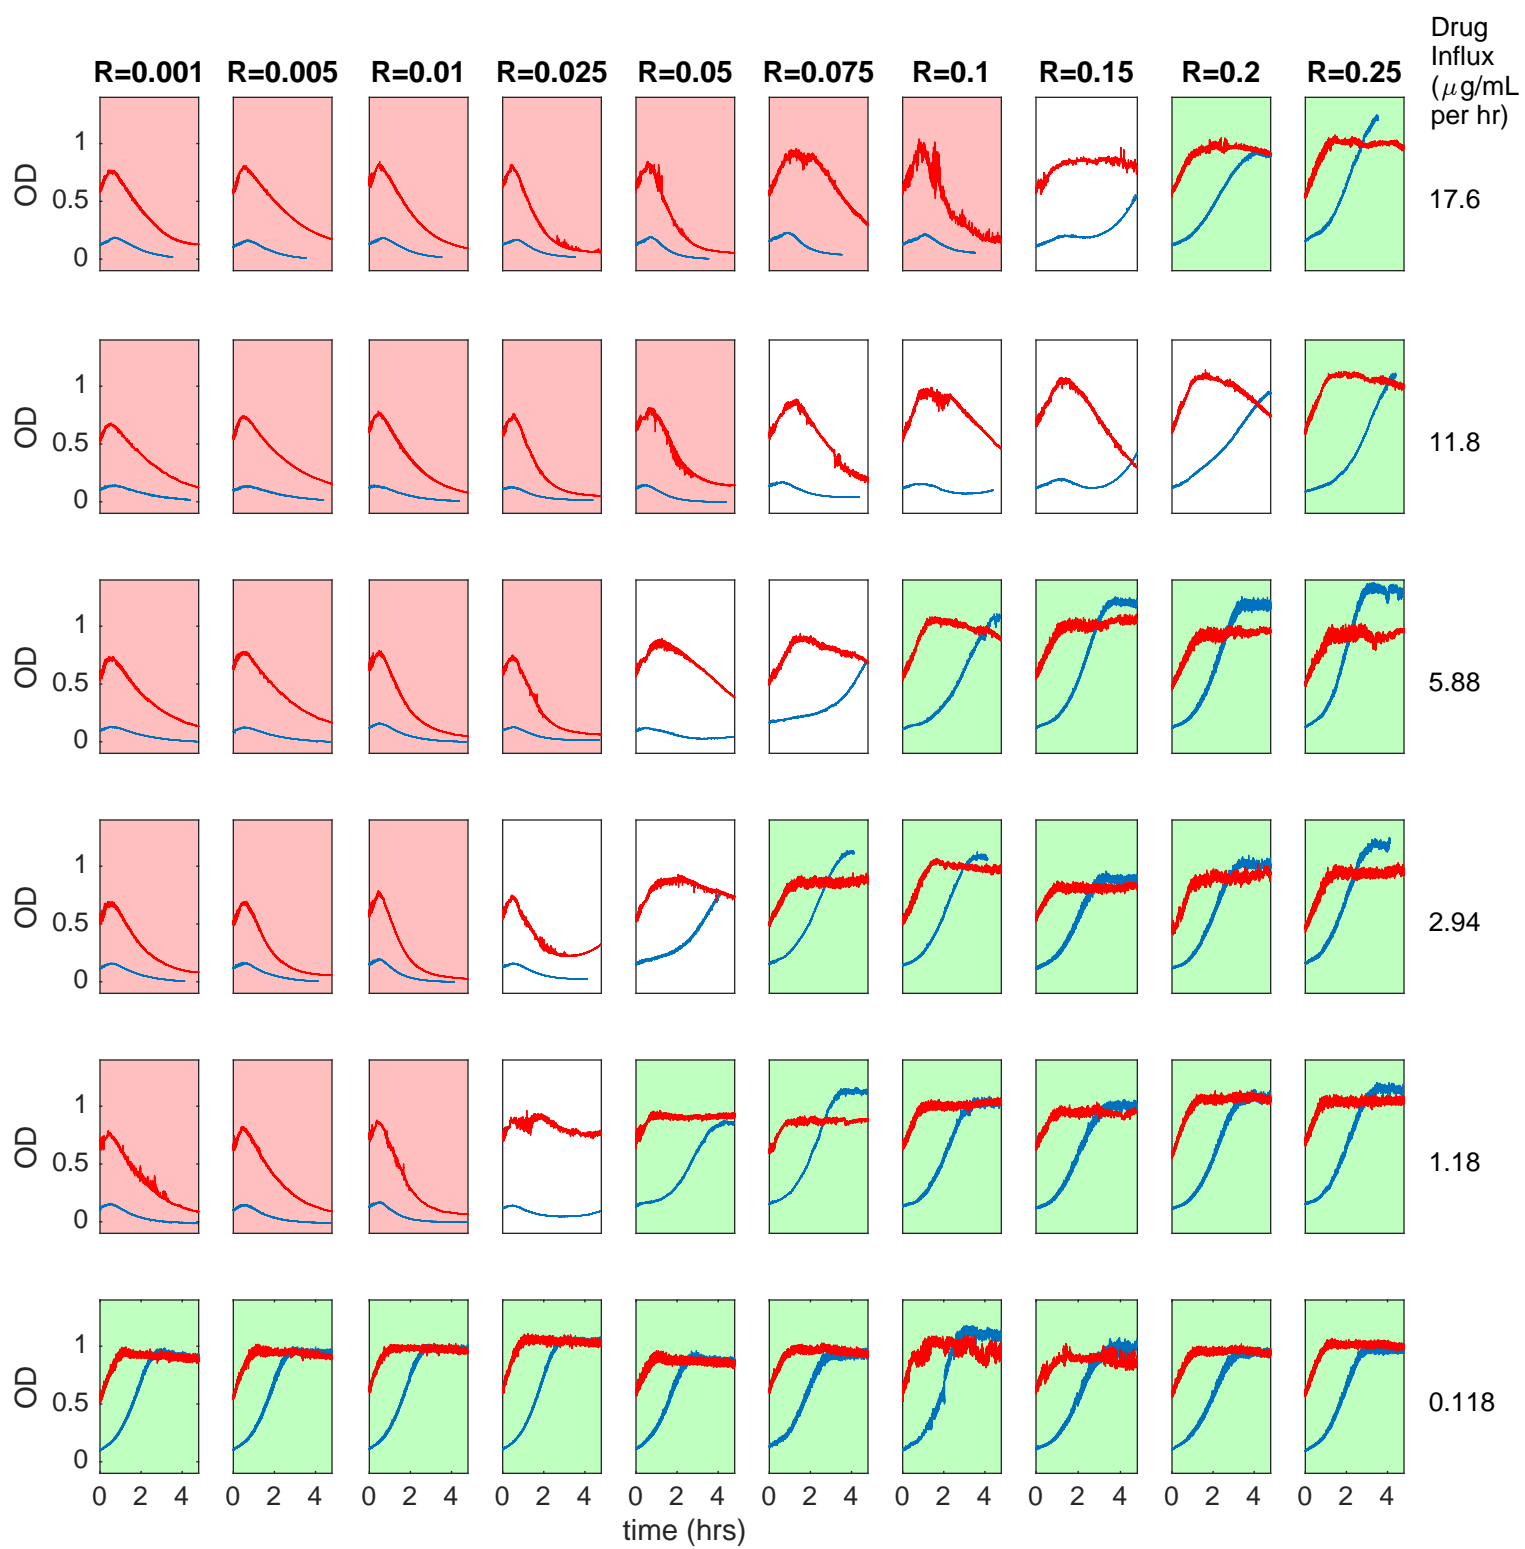

Supplement: supp [file elife-52813-supp-v1.zip › elife_poa_e52813_Figure_3_figure_supplement_6.pdf]

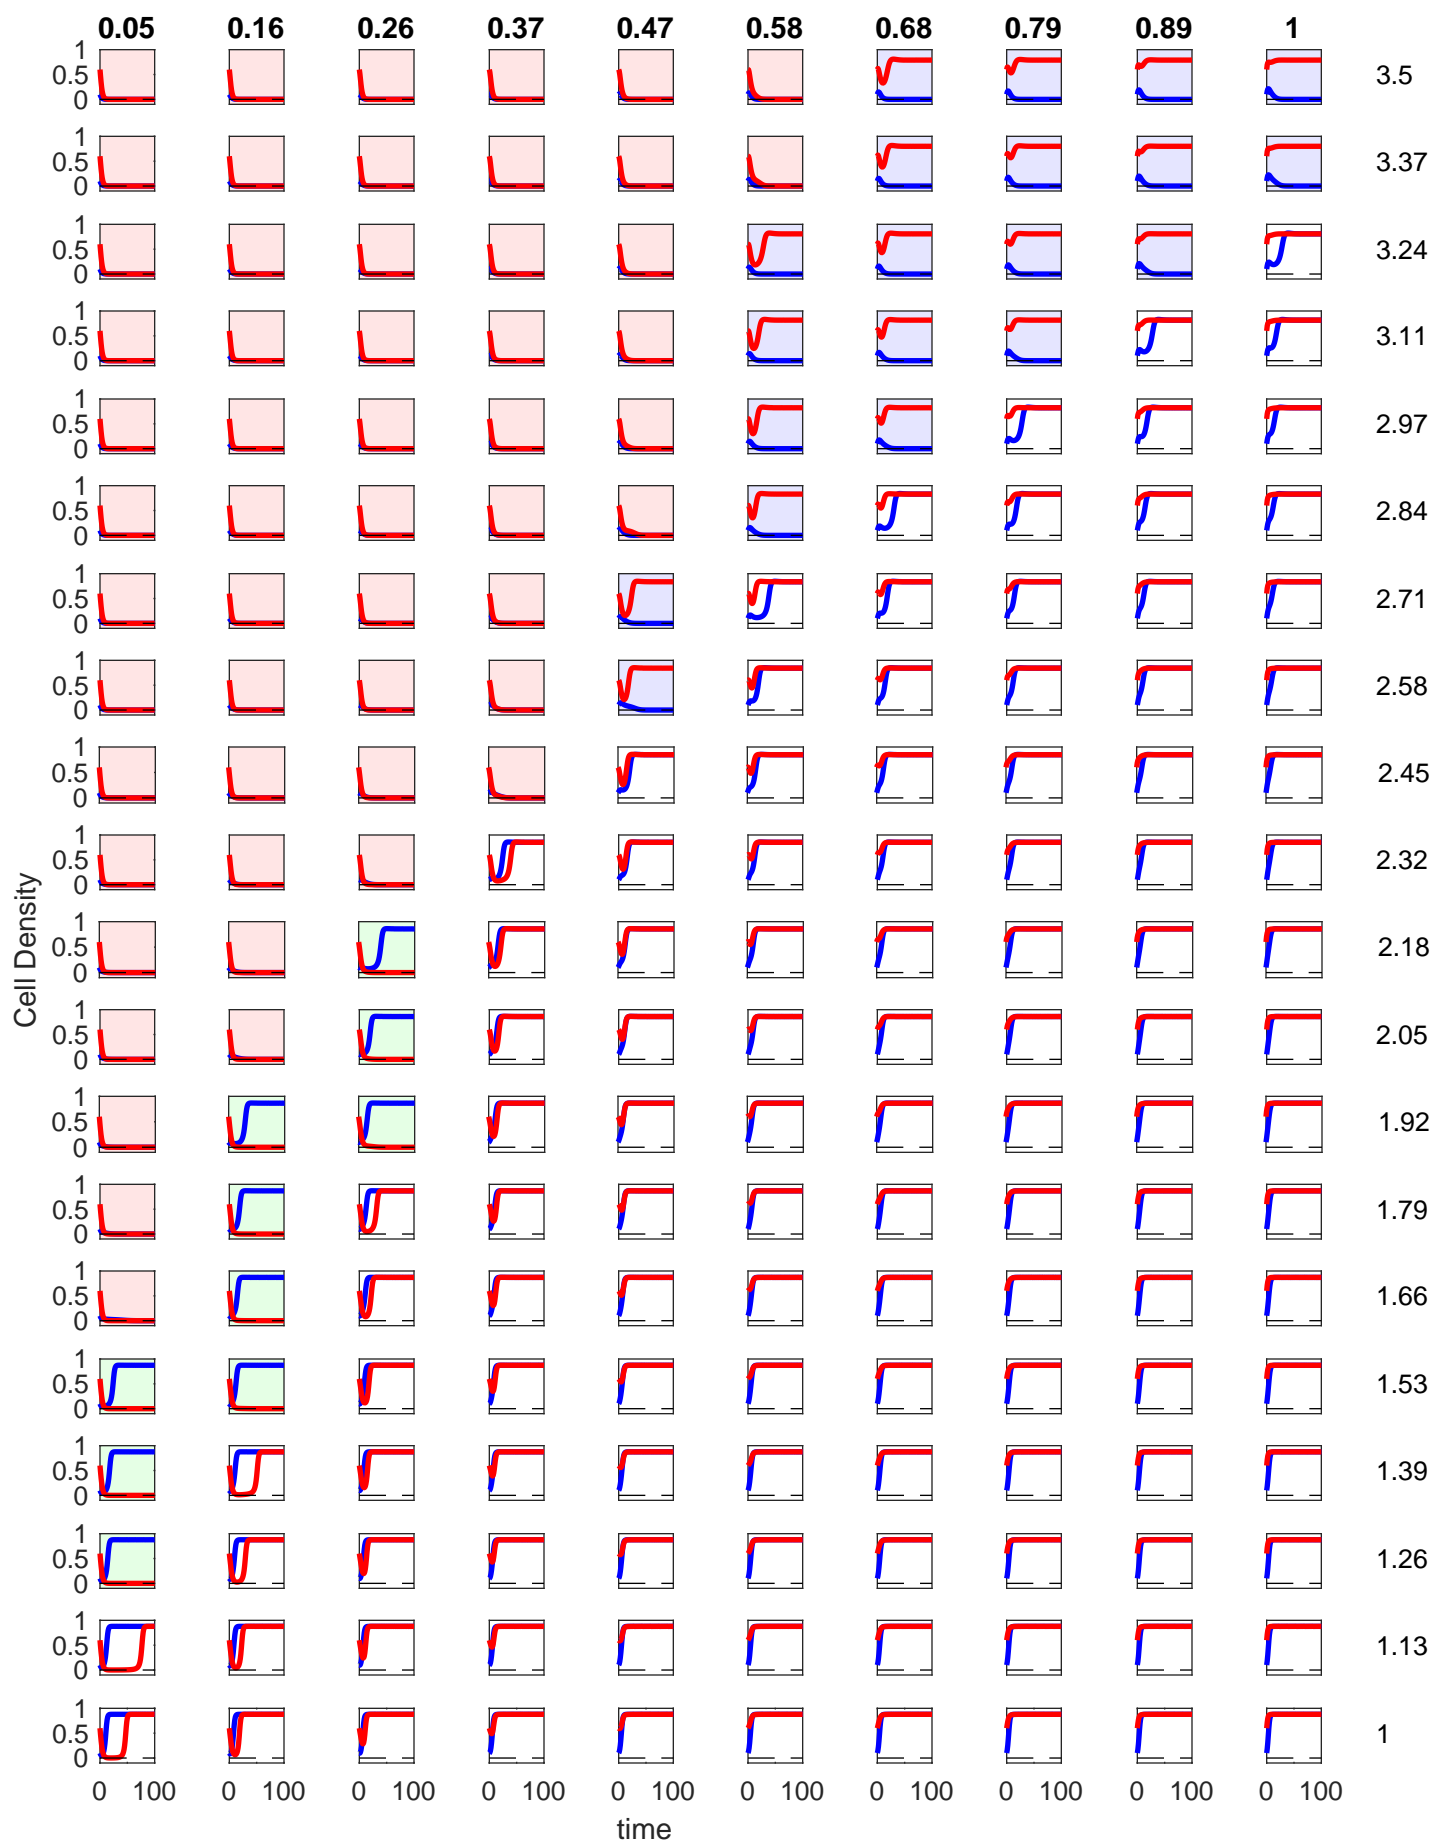

Supplement: supp [file elife-52813-supp-v1.zip › elife_poa_e52813_Figure_3_figure_supplement_3.pdf]

With Reverse Inoculum Effect

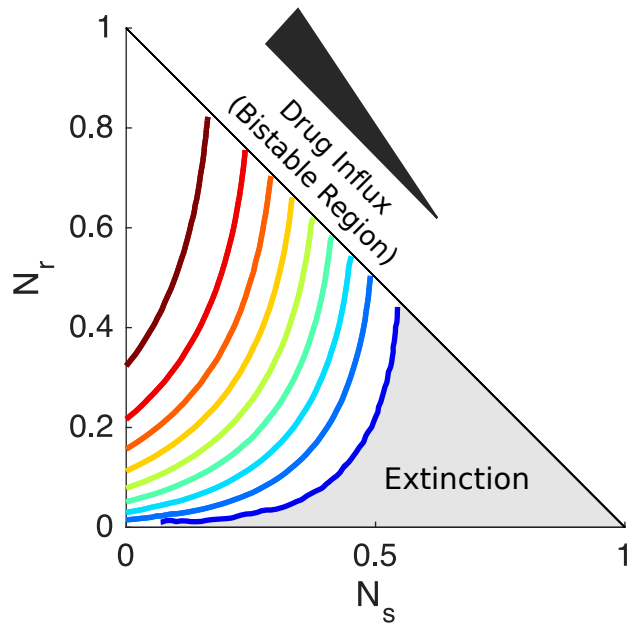

No Reverse Inoculum Effect

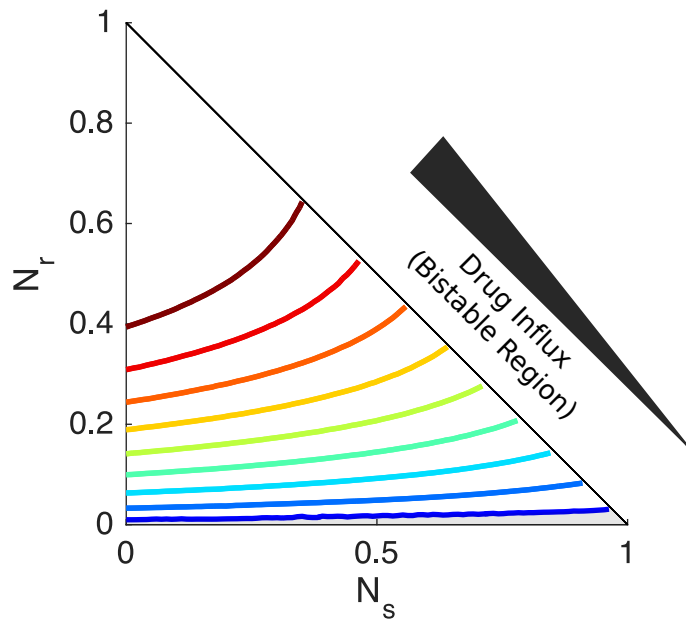

Supplement: supp [file elife-52813-supp-v1.zip › elife_poa_e52813_Figure_2_figure_supplement_1.pdf]

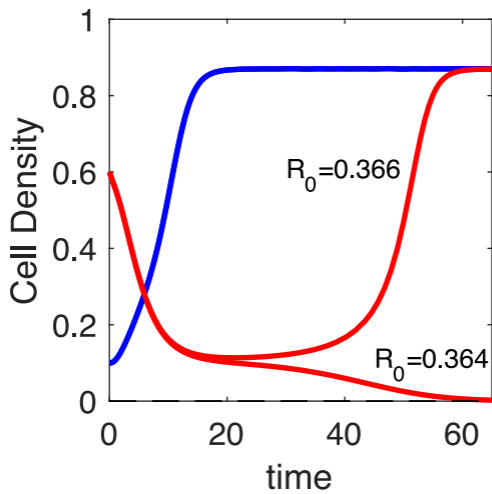

Supplement: supp [file elife-52813-supp-v1.zip › elife_poa_e52813_Figure_3_figure_supplement_8.pdf]
